1 **Using single-plant -omics in the field to link maize genes to**  
2 **functions and phenotypes**

3

4 Daniel Felipe Cruz<sup>a,b,§</sup>, Sam De Meyer<sup>a,b,§</sup>, Joke Ampe<sup>a,b</sup>, Heike Sprenger<sup>a,b</sup>, Dorota  
5 Herman<sup>a,b</sup>, Tom Van Hautegeem<sup>a,b</sup>, Jolien De Block<sup>a,b</sup>, Dirk Inzé<sup>a,b</sup>, Hilde Nelissen<sup>a,b</sup>,  
6 and Steven Maere<sup>a,b,\*</sup>.

7 <sup>a</sup> Ghent University, Department of Plant Biotechnology and Bioinformatics,  
8 Technologiepark 71, 9052 Ghent, Belgium

9 <sup>b</sup> VIB Center for Plant Systems Biology, Technologiepark 71, 9052 Ghent, Belgium

10 <sup>§</sup> shared first author

11 <sup>\*</sup> corresponding author

12

## 13 **ABSTRACT**

14 Most of our current knowledge on plant molecular biology is based on experiments in  
15 controlled lab environments. Over the years, lab experiments have generated  
16 substantial insights in the molecular wiring of plant developmental processes, stress  
17 responses and phenotypes. However, translating these insights from the lab to the  
18 field is often not straightforward, in part because field growth conditions are very  
19 different from lab conditions. Here, we test a new experimental design to unravel the  
20 molecular wiring of plants and study gene-phenotype relationships directly in the  
21 field. We molecularly profiled a set of individual maize plants of the same inbred  
22 background grown in the same field, and used the resulting data to predict the  
23 phenotypes of individual plants and the function of maize genes. We show that the  
24 field transcriptomes of individual plants contain as much information on maize gene  
25 function as traditional lab-generated transcriptomes of pooled plant samples subject  
26 to controlled perturbations. Moreover, we show that field-generated transcriptome  
27 and metabolome data can be used to quantitatively predict at least some individual  
28 plant phenotypes. Our results show that profiling individual plants in the field is a  
29 promising experimental design that could help narrow the lab-field gap.

30

## 31 INTRODUCTION

32 Efforts to develop crops with higher yield and higher tolerance to environmental  
33 stress are more important than ever in the quest for global food security and  
34 sustainable agriculture. Crop improvement increasingly relies on the identification of  
35 genes and genetic variants that impact agronomically important traits, so that  
36 beneficial variants can be engineered into the crop or incorporated in breeding  
37 programs. Mapping of quantitative trait loci (QTLs), genome-wide association studies  
38 (GWAS) and genomic prediction techniques are some of the currently preferred  
39 means of identifying the genes and variants influencing a phenotypic trait (Korte and  
40 Farlow, 2013; Desta and Ortiz, 2014). All are based on associating genetic variants,  
41 mostly single-nucleotide polymorphisms (SNPs), to observed traits in a genetically  
42 diverse population of the targeted plant species, e.g. a panel of accessions or a  
43 panel of inbred crosses between two or more parental lines (recombinant inbred  
44 lines, RILs).

45 Although fairly successful in some plant species, e.g. maize, these techniques also  
46 have limitations. They can only detect loci that display genetic variation in the  
47 mapping population. In addition, their resolving power is limited by linkage  
48 disequilibrium (LD), i.e. the non-random association between markers due to genetic  
49 relatedness in the population (Brachi et al., 2011; Korte and Farlow, 2013; Huang  
50 and Han, 2014). As a consequence, loci can often not be resolved to the individual  
51 gene level. GWA studies also have low power for rare alleles and alleles with small  
52 effect sizes, which often account for a substantial proportion of phenotypic variation,  
53 in particular for complex traits such as yield. Moreover, when mapping genotypes  
54 straight to phenotypes, the many intermediate molecular layers that articulate the  
55 phenotype from the genotype, such as the transcriptome or metabolome, are  
56 ignored. Consequently, little mechanistic insight is gained from GWAS or genomic  
57 prediction studies into how a trait is established.

58 As many variants uncovered in GWA studies appear to be regulating gene  
59 expression (Li et al., 2012; Xiao et al., 2017), recent efforts have sought to  
60 complement GWAS with transcriptome-wide association studies (TWAS) , i.e.  
61 mapping gene expression to phenotypes in a genetically diverse population (Harper  
62 et al., 2012; Koprivova et al., 2014; Pasaniuc and Price, 2017; Havlickova et al.,  
63 2018; Kremling et al., 2019). Similarly, several recent studies have used

64 transcriptomic or metabolomic prediction in addition to genomic prediction to  
65 associate genes to plant traits, in particular in maize (Guo et al., 2016; Schrag et al.,  
66 2018; Azodi et al., 2020). Azodi et al. (2020) found that transcript levels and genetic  
67 marker data have comparable performance for predicting maize phenotypes, and  
68 that performance increased when combining both data layers in a joint model.  
69 However, the use of transcriptomes and other intermediate data layers to aid  
70 genotype-phenotype mapping generally remains underexplored (Baute et al., 2015,  
71 2016; Kremling et al., 2019).

72 Whereas GWAS and related methods exploit the natural genetic variation within a  
73 species to associate genes with phenotypes, systems biology studies use controlled  
74 perturbations, either genetic, environmental or chemical, in a specific genetic  
75 background to unravel the molecular wiring of plant traits. Since the advent of high-  
76 throughput gene expression profiling platforms, massive amounts of data have been  
77 generated on the transcriptomic responses of e.g. *Arabidopsis thaliana* Col-0 to  
78 various mutations and environmental stresses, with the purpose of unraveling the  
79 molecular processes underlying a variety of traits. However, many independent  
80 perturbations are needed to accurately reconstruct the molecular network underlying  
81 a complex trait, and no datasets exist in which any particular complex plant trait is  
82 systematically assessed molecularly and phenotypically under a large-enough set of  
83 perturbations to unravel more than fragments of its molecular wiring.

84 The identification of a sufficient set of controlled perturbations informative of a  
85 process of interest is one of the major bottlenecks in present-day systems biology. It  
86 is often practically infeasible to identify, let alone implement, a large enough number  
87 of different controlled perturbations (mutants, stresses) relevant to a trait of interest in  
88 a single plant lineage (in contrast to GWA studies, where the genetic differences  
89 across lineages function as perturbations). Another issue is that such controlled  
90 perturbations are mostly applied in a lab environment, where apart from the imposed  
91 perturbation all other parameters are kept optimal and do not restrict plant growth  
92 and development. This situation does not reflect realistic field conditions, where at  
93 any given time plants are exposed to a combination of different environmental  
94 stressors with highly variable temporal and spatial patterns of occurrence (Mittler and  
95 Blumwald, 2010; Thoen et al., 2017). Increasing evidence is pointing towards the  
96 unique character of plant molecular responses to combinations of stresses, which

97 often have non-additive effects on the molecular and phenotypic level (Atkinson and  
98 Urwin, 2012; Rasmussen et al., 2013; Cabello et al., 2014; Johnson et al., 2014;  
99 Suzuki et al., 2014; Barah et al., 2016; Davila Olivas et al., 2017; Thoen et al., 2017).  
100 As a result, perturbation studies performed under controlled laboratory conditions are  
101 often of limited predictive value for phenotypes in the field (Mittler, 2006; Oh et al.,  
102 2009; Atkinson and Urwin, 2012; Nelissen et al., 2014; Nelissen et al., 2019). It has  
103 been advocated that to close this lab-field gap, more -omics data and associated  
104 phenotypic data should be generated on field-grown plants (Alexandersson et al.,  
105 2014; Nelissen et al., 2019; Zaidem et al., 2019). Several pioneering studies have  
106 already investigated how gene expression is related to environmental stimuli in the  
107 field (Nagano et al., 2012; Richards et al., 2012; Plessis et al., 2015). Large-scale  
108 studies relating field-generated transcriptomes to field phenotypes are however still  
109 lacking.

110 Here, we propose a new strategy for studying the wiring of plant pathways and traits  
111 directly in the field, involving -omics and phenotype profiling of individual plants of the  
112 same genetic background grown in the same field. Uncontrolled variations in the  
113 micro-environment of the individual plants hereby serve as a perturbation  
114 mechanism. Our expectation is that, in addition to stochastic effects, the individual  
115 plants will be subject to subtly different sets of environmental cues, and will in  
116 response exhibit different molecular profiles and phenotypes. The aim of this study is  
117 to investigate to what extent we can use such individual plant differences in the field  
118 to link genes to biological processes and field phenotypes. Earlier, we found that  
119 gene expression variations among individual *Arabidopsis thaliana* plants grown under  
120 the same stringently controlled lab conditions contain a lot of information on the  
121 molecular wiring of the plants, on par with traditional expression profiles of pooled  
122 plant samples subject to controlled perturbations (Bhosale et al., 2013). If even gene  
123 expression variability among lab-grown plants contains functionally relevant  
124 information, the molecular and phenotypic variability among field-grown plants may  
125 contain a wealth of information on processes occurring in the field.

126 We profiled the ear leaf transcriptome, ear leaf metabolome and a number of  
127 phenotypes for individual field-grown maize plants of the same inbred line (*Zea mays*  
128 B104), and used the resulting data to predict the function of genes and to  
129 quantitatively predict individual plant phenotypes. We find that our single-plant

130 transcriptome dataset can predict the function of maize genes as efficiently as  
131 traditional lab-based perturbational datasets. Furthermore, we show that some  
132 quantitative phenotypes, in particular leaf blade width and length, can be predicted  
133 fairly well from the leaf transcriptome and metabolome data generated for the  
134 individual plants. These results open perspectives for the further use of field-  
135 generated single-plant datasets to unravel the molecular networks underlying crop  
136 phenotypes and stress responses in the field.

## 137 **RESULTS**

### 138 **Field trial design and exploratory data analysis**

139 During the 2015 growth season, 560 maize plants of the B104 inbred line were grown  
140 in a field in Zwijnaarde, Belgium (see Methods and Figure 1). At tasseling (VT stage),  
141 the ear leaf and the growing ear were harvested for 200 non-border plants with a  
142 primary ear at leaf 16, and plant height, the number of leaves, the length and width of  
143 the ear leaf (leaf 16) blade, husk leaf length and ear length were measured  
144 (Supplemental Data Set 1). For 60 randomly chosen plants out of these 200, the  
145 transcriptome of mature ear leaf tissue was profiled using RNA-seq. Additionally, for  
146 50 out of those 60 plants, metabolite profiles were generated on the same samples  
147 used for transcriptome profiling. After pre-processing and filtering (see Methods),  
148 data on the levels of 18,171 transcripts and 598 metabolites in mature ear leaf tissue  
149 were obtained for 60 and 50 plants, respectively (Supplemental Data Set 1).

150 As no differential treatments or control measures were applied to any plant subsets,  
151 no distinct sample groups are expected in our data, with the possible exception of  
152 subsets of plants harvested on different dates (because of developmental differences  
153 between plants, see Methods). Indeed, principal component analysis (PCA) on the  
154 gene expression, metabolite and phenotype data (Figure 1) did not reveal a clear  
155 group structure among the samples, although the date of harvest does have a clear  
156 effect along PC2 of the transcriptome and phenotype profiles of the plants. Despite  
157 the absence of designed major effects in our experimental setup, other than the  
158 harvesting date, we observed substantial variability in the transcriptome and  
159 metabolome profiles and the phenotypes of the individual plants (Figure 2).  
160 Transcript levels have on average a coefficient of variation (CV) of 0.3037 across  
161 plants, metabolite levels have a CV of 0.3128 on average, and all phenotypes have a  
162  $CV \geq 0.0521$ . This variability could either be caused by technical noise, inherent

163 stochasticity of molecular processes within the plant, or external factors such as  
164 variability in the growth micro-environment of the individual plants. The last two  
165 processes are expected to generate biologically meaningful variation that may  
166 propagate from the molecular to the phenotypic level, or vice versa.

167 If the variability in the data is biological in nature and propagates through the  
168 molecular networks of the plant, plants with similar gene expression profiles may be  
169 expected to also have similar metabolite and phenotype profiles. Indeed, plant-to-  
170 plant distances in transcriptome, metabolome and phenotype space were found to be  
171 significantly positively correlated (Supplemental Figure 1). Interestingly, the  
172 phenotype distance between plants was also significantly positively correlated with  
173 the physical distance between plants in the field. All phenotypes were found to be  
174 spatially autocorrelated at  $q \leq 0.05$  (see Methods, Supplemental Figure 2 and  
175 Supplemental Data Set 2). A weak but borderline significant positive correlation was  
176 also found between the metabolome distance and physical distance between plants,  
177 and 24 out of 592 metabolites exhibit spatial patterning at  $q \leq 0.01$  (Supplemental  
178 Data Set 2). No significant correlation was found between the physical distance of  
179 plants and their overall distance in transcriptome space (Supplemental Figure 1),  
180 indicating that most genes do not exhibit spatially patterned gene expression.  
181 However, spatial autocorrelation analysis of the transcriptome data revealed that  
182 1,134 out of 18,171 transcripts do exhibit spatial patterning at  $q \leq 0.01$  (Supplemental  
183 Data Set 2). The spatially autocorrelated transcripts were grouped in 30 co-  
184 expression clusters plus one 'noise' cluster (see Methods and Supplemental Data  
185 Set 3, cluster 1 is the noise cluster). Significant GO enrichments were found in 17 of  
186 these autocorrelated transcript clusters, e.g. cluster 3 was found enriched in genes  
187 involved in the response to chitin, cluster 16 in reproductive system development  
188 genes, and cluster 31 in chloroplast-associated genes (Supplemental Data Set 3).  
189 This indicates that the activity of several biological processes varied across the field  
190 in a spatially patterned way. Eleven of the 30 autocorrelated transcript clusters  
191 correlated with at least one measured phenotype at  $q \leq 0.05$  (Supplemental Data Sets  
192 3 and 4). The average gene expression profile of cluster 29 for instance correlates  
193 significantly with ear length (Figure 3). Interestingly, two of the 35 genes in cluster 29  
194 are homeotic transcription factors, and both have previously been associated with  
195 ear development: GRMZM2G171365 (*SUPPRESSOR OF OVEREXPRESSION OF*  
196 *CONSTANS 1*, *ZmSOC1*, *ZmMADS1*), a MADS-box transcription factor known to



197 promote flowering (Zhao et al., 2014; Alter et al., 2016) and also known to be  
198 upregulated in leaves during the floral transition (Alter et al., 2016), and  
199 GRMZM2G034113 (*hb126*), a homeobox transcription factor previously found in a  
200 GWAS study as a candidate gene for ear height (Li et al., 2016). Overall, the  
201 presence of spatially autocorrelated patterns in the transcriptome, metabolome and  
202 phenotype data indicate that at least part of the variability observed among the  
203 individual plants is due to micro-environmental factors that have a spatial structure.  
204 Correlations between the molecular and phenotypic data layers indicate that this  
205 variability propagates from one layer to another.

### 206 **Variability of gene expression across plants gives insight into biological** 207 **processes active in the field**

208 We investigated which genes have highly variable expression levels in the field  
209 setting used, and which ones are stably expressed across the field. We ranked  
210 genes based on the coefficient of variation (CV) of their gene expression profile  
211 across the field (Supplemental Data Set 5), excluding the 5% lowest expressed  
212 genes. We found that stably expressed genes have on average longer coding  
213 sequences than variably expressed genes and have on average more introns and  
214 exons (Supplemental Table 1). Similar results were previously obtained in a study in  
215 which individual lab-grown *Arabidopsis thaliana* plants were expression profiled  
216 (Cortijo et al., 2019), and the authors showed that their observations could not be  
217 accounted for by technical artefacts related to differences in the average RNA-seq  
218 coverage of longer versus shorter genes. Similar to Cortijo et al. (2019), we also  
219 found that variably expressed genes are on average connected to 6.54 times more  
220 transcription factors than stably expressed genes in a coexpression network  
221 constructed from the single-plant transcriptome data (see Methods, one-tailed Mann–  
222 Whitney U (MWU) test,  $q = 5.92E-59$ ). This again suggests that at least part of the  
223 observed variability in gene expression levels across plants is biological in nature.

224 Mann–Whitney U tests (Mann and Whitney, 1947) were performed to determine  
225 which Gene Ontology (GO) biological processes are represented more at the top or  
226 bottom of the CV-ranked gene list than expected by chance (Supplemental Data Set  
227 6). Genes related to cell wall organization, biotic stresses impacting the cell wall  
228 (herbivores, chitin), secondary metabolism, photosynthesis, abscisic acid transport,  
229 brassinosteroid and trehalose metabolism and gibberilic acid signaling were found to



230 be among the more variably expressed genes across the field, suggesting that the  
231 harvested leaves were differentially impacted by biotic and possibly abiotic stress  
232 factors. The processes that are most stably expressed across the field are mainly  
233 housekeeping processes related to e.g. the metabolism and transport of proteins and  
234 mRNAs, and chromatin organization (Supplemental Data Set 6). However, not all  
235 genes annotated to 'stable' GO processes are stably expressed. The top-10 of most  
236 variably expressed genes for instance includes eight genes involved in chromatin  
237 organization or DNA replication, among which five histones (Supplemental Data Set  
238 5). Interestingly, the GO enrichments obtained for variably and stably expressed  
239 genes in the field-grown maize plant dataset are largely in line with the results  
240 reported by Cortijo et al. (2019) on the variability of gene expression in individual lab-  
241 grown *A. thaliana* plants. Photosynthesis, secondary metabolism, cell wall  
242 organization and defense response genes for instance were also found enriched by  
243 Cortijo et al. (2019) in several of the highly variable gene sets they compiled for  
244 different sampling time points in a 24h time span, while RNA and protein metabolism  
245 genes feature prominently in some of their lowly variable gene lists.

246 Hierarchical clustering of the transcriptome and metabolome data offers an overall  
247 view of the molecular variability across the plants profiled (Supplemental Figure 3).  
248 Several clusters were found to be significantly enriched in genes involved in  
249 particular biological processes, further confirming that the single-plant dataset  
250 contains biologically meaningful information (Supplemental Data Set 7). Also the  
251 biclustering approaches ISA (Bergmann et al., 2003), SAMBA (Tanay et al., 2002)  
252 and ENIGMA (Maere et al., 2008) yielded a variety of modules enriched for genes  
253 involved in processes such as photosynthesis, cell wall organization, response to  
254 chitin and others (Supplemental Data Set 7). An example ENIGMA module, enriched  
255 for known reproductive development genes, is shown in Figure 4. In this module and  
256 many others (see e.g. the photosynthesis and response to chitin clusters in  
257 Supplemental Figure 3), different subgroups of plants show clearly different  
258 expression profiles, highlighting that many processes are not homogeneously active  
259 across the field.

## 260 **Gene function prediction from single-plant transcriptome data**

261 In previous work, we showed that expression variations among individual *Arabidopsis*  
262 *thaliana* plants, all grown under the same stringently controlled conditions, can

263 efficiently predict gene functions (Bhosale et al., 2013). To investigate whether  
264 expression variations among maize plants grown under uncontrolled field conditions  
265 can similarly be used to predict gene functions, we constructed a network of  
266 significantly coexpressed genes from the transcriptome data, using spatially adjusted  
267 Pearson correlation coefficients between the log<sub>2</sub>-transformed gene expression  
268 profiles (see Methods). Accounting for the spatial autocorrelation structure of our  
269 field-generated data is necessary to avoid inflation of the false positive rate (Lennon,  
270 2000). The function of any given gene in this coexpression network was predicted  
271 based on the annotated functions of the gene's network neighbors (see Methods). To  
272 compare the function prediction performance of our single-plant dataset with that of  
273 traditional gene expression datasets on pooled samples of plants grown under  
274 controlled conditions, we ran the same function prediction pipeline on 500 networks  
275 constructed from gene expression datasets on maize leaves available from the Short  
276 Read Archive (SRA) transcriptome database (see Methods and Supplemental Data  
277 Set 8). Each of these 500 networks was inferred from a dataset of the same size as  
278 the single-plant dataset, containing 60 transcriptome profiles sampled from the SRA.  
279 The number of significant edges (Bonferroni-corrected  $p \leq 0.01$ ) inferred from these  
280 sampled datasets was systematically higher than the number of edges inferred from  
281 the single-plant dataset. One factor causing this is that the SRA transcriptome data  
282 exhibits clear groups of experimental conditions for which expression profiles are  
283 more similar within groups than between groups (Supplemental Figure 4), more so  
284 than the single-plant data. This group structure causes inflated correlation  $p$ -values in  
285 the sampled networks. Since correlation networks with more edges are biased  
286 towards better function prediction performance (Supplemental Figure 5), the number  
287 of edges included in each sampled network was fixed to the number of significant  
288 edges observed in the single-plant network (771,610 edges). Other network  
289 properties such as the number of nodes, network density, average clustering  
290 coefficient and unannotated gene fraction were not significantly different between the  
291 resulting sampled networks and the single-plant network (Table 1).

292 The overall gene function prediction performance of all networks was scored using  
293 known GO annotations for maize as the gold standard (see Methods). For each  
294 network, we calculated the fraction of known gene function annotations recovered by  
295 the predictions (recall), the fraction of gene function predictions supported by the gold  
296 standard (precision) and the F-measure (harmonic mean of precision and recall) at

297 different false discovery rate (FDR) levels, ranging from  $q = 0.01$  to  $10^{-11}$  (Figure 5).  
298 Except at the highest-confidence prediction thresholds ( $q \leq 10^{-9}$ ), the recall of the  
299 single-plant network was higher than the 75<sup>th</sup> percentile of the recall values for the  
300 sampled networks, indicating that the single-plant network predictions generally  
301 recover more known gene functions than the sampled network predictions. On the  
302 other hand, the predictions of the single-plant network are generally less precise than  
303 those of most sampled networks, except at lower-confidence prediction thresholds ( $q$   
304  $\geq 10^{-4}$ ). As a result, the overall function prediction performance of the single-plant  
305 network (as measured by the F-measure) is higher than that of the majority of  
306 sampled networks for  $q \geq 10^{-6}$ , but lower for  $q \leq 10^{-7}$ . This is mostly due to the lower  
307 precision of the single-plant network predictions at higher confidence levels :  
308 compared to the sampled networks, a bigger proportion of the high-confidence  
309 function predictions made by the single-plant network is not supported by the gold  
310 standard.

311 There are reasons to believe that not all of these excess false positive predictions  
312 made by the single-plant network at high confidence levels are truly wrong. First, the  
313 GO annotation for maize, used here as the gold standard, is incomplete. Of the  
314 39,479 genes in the maize genome (version V3 5b+), 9,884 have no biological  
315 process assignments in the GO annotation file we compiled (see Methods), and  
316 many others likely have incomplete or faulty annotations (Rhee and Mutwil, 2014;  
317 Wimalanathan et al., 2018). High-confidence gene function predictions labeled as  
318 false positives may therefore be regarded rather as new gene function predictions to  
319 be tested. By itself however, the incompleteness of the gold standard should not lead  
320 to a specific disadvantage for the single-plant network, as all networks are compared  
321 on the same footing. More importantly, the current annotations in GO are mostly  
322 derived from traditional lab-based perturbation experiments on pooled plant samples,  
323 akin to the ones used to construct the sampled networks. This may create a bias in  
324 favor of the sampled networks, in particular for the precision measurements (see also  
325 Discussion). The recall measure should therefore probably get a higher weight when  
326 comparing the gene function prediction performance of the single-plant and sampled  
327 networks.

328 **Single-plant dataset contains information on biological processes that are**  
329 **active and varying between plants in the field context**

330 To assess whether the single-plant dataset contains more information on some  
331 biological processes than on others, we investigated how well the gene function  
332 predictions on the single-plant network and sampled networks could recover the  
333 genes involved in specific biological processes (see Methods). The function  
334 prediction performance of all networks was scored for 207 different GO categories,  
335 including the categories investigated in (Bhosale et al., 2013) and 56 GO categories  
336 that were found enriched in one or more of the (bi)clusters obtained from the single-  
337 plant dataset (Supplemental Data Set 9). Figure 6 shows the relative performance of  
338 the single-plant network for a selection of GO categories related to abiotic and biotic  
339 stress responses, hormonal responses and development (see Supplemental Data  
340 Set 9 and 10 for results on other GO categories).

341 For abiotic stresses, the single-plant network scores very well compared to the  
342 sampled networks for responses to cold and heat, salt stress and drought (water  
343 deprivation), all of which are relevant from a field perspective. For light responses,  
344 the picture is more nuanced, with very good performance for responses to blue light  
345 and UV light, ambiguous performance for categories related to '*response to red- and*  
346 '*far-red light*' and very poor performance for '*response to light intensity*' and  
347 '*photoperiodism*'. The overall very good function prediction performance for  
348 '*response to abiotic stimulus*' indicates that there is considerable variation across the  
349 field in the transcriptional activity of the genes concerned, which suggests that the  
350 individual plants were subject to multiple abiotic environmental cues that varied in  
351 intensity across the field.

352 Concerning responses to biotic stimuli, the single-plant predictions score very well for  
353 the '*response to herbivore*' and '*response to bacterium*' categories, average for  
354 '*response to fungus*', and poor for '*response to nematode*' and '*response to symbiont*'  
355 (Figure 6 and Supplemental Dataset 9). This indicates that the individual plants may  
356 have been variably exposed to biotic stresses, in particular bacteria and fungi. The  
357 single-plant network also scored very well for some GO categories related to biotic  
358 stimulus responses that are not shown in Figure 6, such as '*defense response*' and  
359 '*response to chitin*' (Supplemental Data Set 9). The function prediction performance  
360 for other biotic stress categories such as '*response to insect*' or '*response to*  
361 '*oomycetes*' could not be assessed because both the sampled and single-plant  
362 datasets did not yield enough predictions (see Methods).

363 Similarly, both the sampled and single-plant datasets failed to deliver sufficient  
364 predictions to score the function prediction performance for responses to jasmonic  
365 acid, gibberellins, salicylic acid and strigolactones. Among the hormone responses  
366 for which the gene function prediction performance of the single-plant dataset could  
367 be scored, the responses to abscisic acid (ABA), cytokinin and ethylene score very  
368 well, '*response to brassinosteroids*' scores average and '*response to auxin*' scores  
369 very poorly. The very poor function prediction performance for auxin response genes  
370 is consistent with the fact that only mature leaf tissue was profiled in the single-plant  
371 experiment, where auxin signaling is less active (Brumos et al., 2018). In contrast,  
372 the sampled datasets also contain experiments on entire leaves, leaf primordia and  
373 leaf zones such as the division and elongation zone where auxin signaling is more  
374 active (Supplemental Data Set 8).

375 Regarding developmental processes, the single-plant dataset scores very well for  
376 predicting genes involved in leaf development and embryo development, well for root  
377 development, average for seed and fruit development and very poor for flower  
378 development. The (very) good prediction performances for root and embryo  
379 development may come as a surprise given that only leaf material was profiled, but  
380 one needs to keep in mind that all performances are scored relative to the  
381 performance of the sampled datasets, which also exclusively profiled leaves. Even  
382 then, it may be considered surprising that leaf expression profiles contain any  
383 information at all on developmental processes occurring in other tissues such as  
384 roots, flowers or fruits. However, many genes influencing e.g. root development may  
385 also function in some capacity in leaves (Taniguchi et al., 2017; Yang et al., 2019).  
386 More genuinely surprising is that the single-plant dataset outperforms more than 75%  
387 of the sampled datasets for predicting genes involved in leaf development, both in  
388 terms of precision and recall, despite only profiling mature leaf tissue of ear leaves.

### 389 **Exploration of new maize genes predicted to be involved in biotic and abiotic** 390 **stress responses**

391 In total, 1,620,503 novel gene function predictions (i.e. predictions not matching GO  
392 annotations) were obtained from the single-plant dataset at  $q \leq 0.01$  (Supplemental  
393 Data set 11). To assess the quality of these predictions, we performed a literature  
394 screen to search for evidence supporting the top-10 regulator predictions for the GO  
395 categories '*response to chitin*', '*response to water deprivation*' and '*C<sub>4</sub>*

396 *photosynthesis*'. The first two are categories for which the single-plant dataset  
397 exhibited very good gene function prediction performance compared to the sampled  
398 datasets. '*C<sub>4</sub> photosynthesis*' on the other hand scored very poorly in the single-plant  
399 dataset (Supplemental Data Set 9-10). We included this category in the literature  
400 validation effort to assess whether poor gene function prediction performance for a  
401 biological process, as scored based on which genes are already annotated to the  
402 process in GO, also entails that newly predicted links between genes and the  
403 process under study are of poor quality.

404 '*Response to chitin*' was among the best-scoring GO categories in our assessment of  
405 the gene function prediction performance of the single-plant dataset. Chitin is a main  
406 component of fungal cell walls and insect exoskeletons (Fleet, 1991; Latgé, 2007),  
407 and the response to chitin is therefore closely related to the responses to fungi and  
408 insects. For three out of the top-10 novel transcriptional regulators predicted to be  
409 involved in the response to chitin (Supplemental Table 2), we found indirect evidence  
410 in literature in support of the predictions. *ZmWRKY53* (GRMZM2G012724), on the 3<sup>rd</sup>  
411 position in the ranking, was previously found to be involved in the response of maize  
412 to *Aspergillus flavus*, a fungal pathogen that affects maize kernel tissues and  
413 produces mycotoxins that are harmful for humans and animals (Fountain et al.,  
414 2015). *ZmWRKY53* was found to be strongly upregulated in both a susceptible and a  
415 resistant maize line upon inoculation of kernels with *Aspergillus flavus* (Fountain et  
416 al., 2015). Its putative functional ortholog in *Arabidopsis thaliana*, *AtWRKY33*, is  
417 known to regulate defense response genes (Zheng et al., 2006; Birkenbihl et al.,  
418 2012), and its putative functional orthologs in *Triticum aestivum* (*TaWRKY53*) and  
419 *Oryza sativa* (*OsWRKY53*) have previously been suggested to regulate several biotic  
420 and abiotic stress response genes, including chitinases (Van Eck et al., 2014).  
421 Overexpression of *OsWRKY53* was also shown to increase the resistance of *O.*  
422 *sativa* to herbivory by the brown planthopper *Nilaparvata lugens* (Hu et al., 2016).  
423 Another WRKY TF in the top-10 list, *ZmWRKY92* (GRMZM2G449681, rank 5), was  
424 previously found to be induced upon *Fusarium verticillioides* inoculation of kernels in  
425 the ear rot-resistant maize inbred line BT-1 (Wang et al., 2016). The 8<sup>th</sup> gene in the  
426 top-10 list, GRMZM2G042756 (AP2-EREBP-transcription factor 105), was previously  
427 found to be upregulated upon infection of a maize line with *Ustilago maydis*, a  
428 basidiomycete fungus that causes common smut in maize (Donaldson et al., 2013).



429 The second GO category for which we screened literature is '*response to water*  
430 *deprivation*'. Four of the top-10 transcriptional regulators predicted to be involved in  
431 drought stress responses, but not annotated as such in GO, have previously been  
432 linked to drought stress in other studies (Supplemental Table 3). *ZmWRKY40*  
433 (GRMZM2G120320, rank 9) was shown to confer drought resistance when it was  
434 overexpressed in *A. thaliana* (Wang et al., 2018b). *ZmXLG3b* (GRMZM2G429113,  
435 rank 1), encoding a guanine nucleotide-binding protein predicted to be involved in the  
436 response to desiccation, was found to be downregulated in the drought-tolerant  
437 H082183 line but upregulated in the drought-susceptible maize line Lv28 under  
438 severe drought stress versus control conditions (Zhang et al., 2017). Moreover,  
439 *ZmXLG3b* was identified as a candidate drought stress response gene in a GWAS  
440 study on 300 inbred maize lines, and its expression level was found to anticorrelate  
441 with drought stress tolerance levels in four tested maize lines (Yuan et al., 2019).  
442 *ZmMPK3-1* (GRMZM2G053987, rank 4), a mitogen-activated protein kinase (MAPK),  
443 was previously found to be upregulated in leaf and stem tissue upon drought stress  
444 in maize (Liu et al., 2015b). *ZmTPS13.1* (GRMZM2G416836, rank 3), predicted to be  
445 involved in drought recovery in our analysis, encodes a putative trehalose-phosphate  
446 synthase functioning in the trehalose biosynthesis pathway. The trehalose precursor  
447 trehalose-6-phosphate (T6P) is known to function as a signaling molecule  
448 coordinating carbohydrate metabolism and developmental processes in plants  
449 (Ponnu et al., 2011). Trehalose and T6P have also been implicated in protecting  
450 plants from various stresses, including drought stress, but the mechanisms involved  
451 are still unclear (Fernandez et al., 2010; Lunn et al., 2014; Nuccio et al., 2015).

452

453 Finally, we screened literature for the top-10 regulators predicted to be involved in  $C_4$   
454 photosynthesis (Supplemental Table 4). Surprisingly, the single-plant dataset  
455 performed very poorly for the light-associated GO categories '*photosynthesis*' and ' $C_4$   
456 *photosynthesis*' (Supplemental Data Set 9-10), even though several '*response to*  
457 *light stimulus*' subcategories scored very well (Figure 6) and though our clustering  
458 analyses revealed several (bi)clusters heavily enriched in photosynthesis genes (see  
459 Supplemental Data Set 7). The performance plots show that the very poor function  
460 prediction performance for photosynthesis categories is due to the single-plant  
461 predictions having a very low precision compared to the predictions from the sampled  
462 datasets, while the number of predictions made by the single-plant data and their



463 recall are comparatively very high (Supplemental Data Set 10). As argued above,  
464 recall values may be more indicative for the quality of gene function predictions than  
465 precision values, given the incompleteness of the maize GO annotation we use as a  
466 reference. If this is the case, genes that are predicted with high confidence to be  
467 involved in C<sub>4</sub> photosynthesis but were scored as false positives by GO may still offer  
468 valuable leads. Indeed, we found evidence in literature linking three of the top-10  
469 predicted regulators to C<sub>4</sub> photosynthesis. *ZmCSP41A* (GRMZM2G111216, rank 1),  
470 a highly conserved sequence-specific chloroplast mRNA binding protein and  
471 unspecific endoribonuclease, was previously found to be more highly expressed in  
472 bundle sheet chloroplasts than in mesophyll chloroplasts (Friso et al., 2010). In the  
473 genus *Flaveria*, which contains C<sub>3</sub> and C<sub>4</sub> species as well as intermediates, a  
474 homolog of *ZmCSP41A* was found to be downregulated in leaves of C<sub>4</sub> species  
475 compared to C<sub>3</sub> species (Gowik et al., 2011). Transcripts of *ZmCRB*  
476 (GRMZM2G165655, rank 2), also accumulate preferentially in bundle sheet cells and  
477 are known to stabilize several chloroplast transcripts, e.g. for photosystem I and II  
478 components (John et al., 2014). *ZmSIG5* (GRMZM2G543629, rank 4) encodes a  
479 plastid sigma factor. Several homologous sigma factors in the *Flaveria* and *Cleome*  
480 genera were found to be upregulated in leaves of C<sub>4</sub> species compared to C<sub>3</sub> species  
481 (Gowik et al., 2011). Furthermore, six of the top-10 genes are known to be  
482 chloroplast-localized (GRMZM2G111216, GRMZM2G165655, GRMZM2G543629,  
483 GRMZM2G140288, GRMZM2G010929) or light-responsive (GRMZM2G158662),  
484 increasing the likelihood that they are involved in processes related to  
485 photosynthesis.

486

#### 487 **Predicting phenotypic traits of individual plants from leaf transcriptome and** 488 **metabolome data.**

489 We investigated to what extent the transcriptome and metabolome data generated on  
490 the individual plants can predict individual plant phenotypes. First, we performed  
491 spatially corrected correlation analyses (see Methods) to identify transcripts that  
492 show a significant linear association with a given phenotype (Supplemental Data Set  
493 12). 1,677 genes exhibit an expression profile that is significantly correlated with leaf  
494 16 blade length, and 411 gene expression profiles are significantly correlated  
495 ( $q \leq 0.05$ ) with leaf 16 blade width. Notably, both for blade length and blade width, the  
496 set of significantly negatively correlated genes with  $R^2 > 0.2$  is enriched in known leaf

497 and flower development genes ( $q < 0.01$ , Supplemental Data Set 12). 273 genes  
498 exhibit an expression profile in mature leaf 16 tissue that is significantly correlated  
499 with ear length at  $q \leq 0.05$  (Supplemental Data Set 12). Among those, the set of genes  
500 negatively correlated to ear length with  $R^2 > 0.2$  contains 3 genes known to be  
501 involved in cellular iron ion homeostasis (enrichment  $q = 8.56e-3$ ), but no other  
502 significant GO enrichments were found. 241 genes have an expression profile that  
503 correlates significantly with husk leaf length (Supplemental Data Set 12). The set of  
504 genes whose expression in mature leaf 16 tissue positively correlates to husk leaf  
505 length ( $q \leq 0.05$ ,  $R^2 > 0.2$ ) is enriched in genes involved in e.g. the response to  
506 oxidative stress, osmotic stress, UV stress and cell growth ( $q < 0.01$ , Supplemental  
507 Data Set 12). Only 35 genes exhibited an expression profile in leaf 16 that is  
508 significantly correlated with plant height at  $q \leq 0.05$ , among which only 4 with an  $R^2$   
509 value  $> 0.2$ , making plant height the phenotype that is least easily connected to the  
510 expression of individual genes in the leaf 16 blade.

511 The phenotypes of the individual plants can be predicted by the expression patterns  
512 of single genes in the leaf 16 blade with maximum  $R^2$  scores ranging from 0.509 (for  
513 blade length) to 0.291 (for plant height, Supplemental Data Set 12). We investigated  
514 whether combinations of genes could lead to a better prediction performance. Elastic  
515 net and random forest techniques were used to construct models predicting the  
516 phenotypes of individual plants as a function of the transcript and metabolite levels in  
517 the harvested leaf samples (see Methods). Elastic net (e-net) regression is a  
518 shrinkage method that is generally well-suited for use on high-dimensional datasets  
519 (Zou and Hastie, 2005). Its combination of the L1 and L2 penalties of its relatives  
520 lasso and ridge regression, respectively, makes e-net regression capable of selecting  
521 groups of correlated features (transcripts, metabolites) as predictors. Rather than  
522 selecting one representative feature from each group (as in lasso regression), e-nets  
523 can select multiple correlated features (as in ridge regression) while still setting the  
524 regression coefficients of irrelevant features to zero. This makes the resulting models  
525 more biologically interpretable. Random forest regression (Breiman, 2001) was used  
526 in addition because this technique can account for some types of interaction effects  
527 between features and is fairly robust to overfitting.

528 Both types of models were learned for each phenotype using either the transcript  
529 levels, the metabolite levels or both as features (see Table 2), each time using a 10-

530 fold nested cross-validation strategy (see Methods). Transcript-based models were  
531 additionally run with either all transcripts or a pre-defined selection of regulatory  
532 transcripts as features (see Methods). The performance of the models was evaluated  
533 in two ways: by pooling the predictions for the test sets in each of the 10 folds into  
534 one dataset and computing the combined 'out-of-bag' (oob)  $R^2$  (pooled  $R^2$ ), and by  
535 computing the oob  $R^2$  on each test fold individually and taking the median (median  
536  $R^2$ , see Methods). For each model with a positive pooled or median  $R^2$  score, 500  
537 datasets with permuted phenotype data were used to compute an empirical  $p$ -value  
538 that reflects whether the  $R^2$  score of the model is significantly higher than the  $R^2$   
539 scores of models learned on randomized data (see Methods and Table 2).

540 The blade length and blade width of leaf 16 (the ear leaf) are the phenotypes that are  
541 best predictable from both the transcriptome and metabolome data (Table 2 and  
542 Supplemental Data Sets 13-14). This is not surprising, as these phenotypes are most  
543 closely related to the plant material that was profiled (mature leaf 16 blade tissue).  
544 The whole-transcriptome e-net model for leaf 16 blade width reached a pooled  $R^2$   
545 score of 0.659, whereas the ordinary least squares (OLS)  $R^2$  value for the best-  
546 correlated single gene is only 0.463 (Supplemental Data Set 12). This indicates that  
547 the multi-gene model for blade width performs substantially better than single-gene  
548 models. The performance difference is likely even higher than suggested by the  $R^2$   
549 difference, as single gene models have an advantage in this comparison: multi-gene  
550 model  $R^2$  values are based on test data while single-gene model  $R^2$  values are based  
551 on training data.

552 The best-performing whole-transcriptome model for leaf 16 blade length on the other  
553 hand has a pooled  $R^2$  score that is only marginally higher than the OLS  $R^2$  value for  
554 the best-correlated single gene (pooled  $R^2 = 0.567$  for the whole-transcriptome  
555 random forest model versus OLS  $R^2 = 0.509$  for the gene GRMZM2G553379,  
556 *ZMM15*, Supplemental Data Set 12). This suggests that maybe only few genes  
557 contribute substantially to the random forest model performance. Indeed, next to the  
558 aforementioned gene *ZMM15*, only one other gene, *ZAP1* (GRMZM2G148693), has  
559 a median importance score above 0.05 in the random forest model for leaf 16 blade  
560 length (Supplemental Data Set 13). Like *ZMM15*, *ZAP1* is found in the top-10 of  
561 genes that are most significantly anticorrelated with blade length (Supplemental Data  
562 Set 12, see below for model interpretation).

563 The models for ear length and plant height have considerably lower oob  $R^2$  scores  
564 than for the leaf 16-related phenotypes, and for plant height even negative  $R^2$  scores  
565 were obtained (Table 2). This suggests that the transcriptome of the sampled leaves  
566 may not contain sufficient information to accurately predict phenotypes measured on  
567 other organs at the time of sampling (see also Discussion). Tellingly, the multi-gene  
568 model oob  $R^2$  scores for both ear length and plant height are much lower than the  
569 best single-gene OLS  $R^2$  scores, suggesting that the multi-gene models severely  
570 overfit the training data (Supplemental Data Set 12). Husk leaf length on the other  
571 hand is predicted almost equally well as the leaf 16 phenotypes (whole-transcriptome  
572 e-net model, pooled  $R^2 = 0.438$ , Table 2). This may be due to the phenotype being  
573 closer to the material that was molecularly profiled, in terms of tissue type or spatial  
574 proximity, than ear length and plant height. However, the best multi-gene model for  
575 husk leaf length merely performs on par with the best single-gene model (OLS  $R^2 =$   
576  $0.460$ , Supplemental Data Set 12). In contrast to what was found for leaf 16 blade  
577 length, this is not because only a few genes contribute to the e-net model  
578 performance for husk leaf length (Supplemental Data Set 15).

579 In general, the models learned on transcriptome and metabolome data have similar  
580 performance for most phenotypes (Table 2). This suggests that both datasets contain  
581 roughly the same amount of information on the phenotypes, despite the fact that  
582 there are many more transcripts (18,171) than metabolites (592) in the data.  
583 Surprisingly, the models learned on both data sources combined did not outperform  
584 the models learned on the transcriptome or metabolome data separately. This  
585 suggests that most of the relevant phenotype information is redundantly present in  
586 both data types. Interestingly, the models learned on the transcriptome data using  
587 only the transcript levels of regulatory genes as features performed generally on par  
588 with the overall transcriptome models (Table 2). This indicates that using the  
589 expression levels of regulatory genes as features may be sufficient to obtain  
590 adequate phenotype predictors, with the advantage that the predictors obtained may  
591 be more interpretable from a mechanistic perspective.

592 We took a closer look at the best-performing transcriptome models for the blade  
593 length and blade width phenotypes. For blade length, the best-performing model is  
594 the random forest model with only regulators as predictors, with a median  $R^2$  score of  
595  $0.534$  and a pooled  $R^2$  score of  $0.609$  (Figure 7). The two regulators with the highest

596 variable importance in this model are the same as the two most important genes in  
597 the whole-transcriptome model, GRMZM2G148693 (*ZAP1*) and GRMZM2G553379  
598 (*ZMM15*) (Supplemental Data Set 13). Both are MADS-box transcription factors  
599 homologous to the *A. thaliana* gene *APETALA1*, and they exhibit a Pearson  
600 expression correlation of 0.79, which explains why one of the two was given a higher  
601 importance score (the second one contains largely redundant information). Their  
602 correlation with blade length is negative and strong. The heavy reliance of both the  
603 whole transcriptome and regulator random forest models on either of these two  
604 genes also helps explain why the predicted blade length values in Figure 7 exhibit a  
605 distinctly bimodal distribution. Interestingly, *ZAP1* was previously found in QTL and  
606 GWA studies as a candidate gene associated with ear length (Xue et al., 2016), ear  
607 height (Vanous et al., 2018), tassel length (Wang et al., 2018a) and flowering time  
608 (Wallace et al., 2016), and it has been implicated in maize domestication, in  
609 particular for temperate maize lines, in which its expression is downregulated (Liu et  
610 al., 2015a).

611 For blade width, the e-net model built on all transcripts performed best (median  $R^2 =$   
612  $0.726$ , pooled  $R^2 = 0.659$ ). 235 transcripts have a median coefficient  $>0.01$  in this  
613 elastic net model (Supplemental Data Set 14), but no significant GO enrichments  
614 were found in the corresponding gene set. In the e-net model for blade width run with  
615 only regulators as predictors (Figure 7), 178 transcripts have a median coefficient  
616 above 0.01 (Supplemental Data Set 14). The regulators with the strongest negative  
617 influence are GRMZM2G023625, a putative HIRA histone chaperone, and  
618 GRMZM2G377311, a putative cyclin T. The only *A. thaliana* homolog of  
619 GRMZM2G023625, *AT3G44530* (*HIRA*), is known to be involved in *knox* gene  
620 silencing during leaf development, and reduced *HIRA* expression levels give rise to  
621 transversally curled (pinched) leaves with shorter petioles and often lobes in the  
622 proximal region of the blade (Phelps-Durr et al., 2005). The *A. thaliana* homologs of  
623 GRMZM2G377311 with the highest sequence similarity, *AT4G19600* (*CYCT1;4*) and  
624 *AT5G45190* (*CYCT1;5*), have been implicated previously in the regulation of leaf and  
625 flower development (Cui et al., 2007). The two regulators with the strongest positive  
626 predicted influence on blade width in the e-net model were GRMZM2G062914 (*MAP*  
627 *KINASE 14*, *MPK14*) and GRMZM2G430780, a putative serine/threonine protein  
628 kinase.

## 629 **DISCUSSION**

630 In this study, we molecularly and phenotypically profiled 60 individual maize plants of  
631 the same inbred line (B104) grown in the same field. Our purpose was to investigate  
632 how much information can be extracted from this simple experimental design on the  
633 function of genes, and on how gene and metabolite expression relates to plant  
634 phenotypes. Although one may expect that this design should yield datasets with a  
635 low information content, due to the very limited genetic and environmental variability  
636 employed, substantial variability was found in the transcriptomes, metabolomes and  
637 phenotypes of the individual plants. Standard deviations on the transcript and  
638 metabolite levels across the field were found to be generally in the order of 10-50%  
639 of the mean. The average transcript level CV of ~0.3 is about three times higher than  
640 the transcript level CV of lab-grown *A. thaliana* plants in a recent study (Cortijo et al.,  
641 2019). Genes involved in processes such as photosynthesis and herbivory  
642 responses were found to be more variably expressed across the field than  
643 housekeeping genes involved in e.g. RNA and protein metabolism, and the  
644 expression patterns of 12.1% of the transcripts and 7.1% of the metabolites profiled  
645 exhibited significant spatial patterning, indicating that the variability uncovered is not  
646 merely random noise.

647 We used the single-plant dataset to predict the function of maize genes from the  
648 function of their coexpression network neighbors ('guilt-by-association'), and found  
649 that field-grown single-plant transcriptomes overall have similar gene function  
650 prediction power as traditional transcriptome datasets profiling pooled plant  
651 responses to controlled perturbations in a lab. Furthermore, the single-plant dataset  
652 was found to outperform the controlled perturbation datasets for several processes  
653 that were likely variably active in the field setting used, in particular abiotic stress  
654 responses. This suggests that datasets in which processes are perturbed more  
655 subtly around a common baseline may hold an advantage for unraveling gene  
656 functions. One of the issues with harsher perturbations is that their effects may  
657 propagate further in the cellular networks, and essentially swamp more subtle  
658 variations in other, sideways associated processes, decreasing the information  
659 content of the resulting data. Pooling samples, although enhancing experimental  
660 repeatability, may similarly decrease the data information content by smoothing out  
661 subtle variations across samples.



662 Comparable results were obtained in an earlier study on individual lab-grown *A.*  
663 *thaliana* plants (Bhosale et al., 2013). One notable difference with the Arabidopsis  
664 results however is that the maize single-plant dataset performs better at predicting  
665 gene functions than most of the traditional transcriptome datasets it is compared to at  
666 higher (less stringent)  $q$ -value thresholds, whereas it performs worse at lower  $q$ -value  
667 thresholds. The opposite trend was observed in Arabidopsis (Bhosale et al., 2013).  
668 This is because, taking the precision of predictions from the traditional datasets as a  
669 baseline for both species, a disproportionately large fraction of the high-confidence  
670 predictions emerging from the maize single-plant dataset are not supported by  
671 existing maize gene function annotations. One potential reason for this surplus of  
672 high-confidence ‘false positives’ is that the maize single-plant dataset, in contrast to  
673 the other maize and Arabidopsis datasets, was generated in a field setting. It is not  
674 unthinkable that lab and field experiments may profile different aspects of gene  
675 function, and therefore lead to complementary predictions. This may help explain  
676 why the lab-generated datasets lead to high-confidence predictions that are more  
677 closely aligned with known gene function annotations, as most of these were also  
678 derived directly or indirectly (in the case of annotations transferred by orthology from  
679 other plant species) from lab experiments. If lab and field experiments indeed profile  
680 complementary aspects of gene function, the novel gene function predictions  
681 obtained from field-generated data could be as valuable as those from lab-generated  
682 data. Confirming the potential value of the novel predictions generated by our field  
683 dataset, we found indirect evidence in literature in support of more than 30% of the  
684 top-10 novel regulator predictions obtained for  $C_4$  photosynthesis, the response to  
685 chitin and the response to water deprivation.

686 Our results indicate that profiling individual plants in the field may also be useful to  
687 identify genes that influence plant phenotypes under field conditions. We used  
688 machine learning models to quantitatively predict phenotypes of individual plants  
689 based on leaf gene expression and metabolome data, and found that leaf  
690 phenotypes could be predicted reasonably well, in particular the blade width of leaf  
691 16 (max. median oob  $R^2$  score = 0.726, max. Pearson correlation (PCC) between  
692 predicted and observed values = 0.821). This is fairly remarkable given that the  
693 models were learned on data for only 60 plants. For comparison, a recent study in  
694 which maize phenotypes were predicted from genetic marker and transcriptome data  
695 for 388 different maize lines reported PCC values of 0.56 to 0.66 between predicted



696 and measured phenotypes when using both genetic markers and transcript levels as  
697 features, and PCC values of 0.51 to 0.61 when using only transcript levels as  
698 features (Azodi et al., 2020). An important difference however is that the (Azodi et al.,  
699 2020) study predicted mature plant phenotypes (final plant height, final yield,  
700 flowering time) from seedling data, whereas we predicted actively developing  
701 phenotypes from contemporarily profiled leaf transcriptome data. Whereas we could  
702 generate decent predictive models for phenotypes that were closely related to the  
703 plant material that was molecularly profiled (length and width of the ear leaf blade,  
704 and to a lesser extent the length of the developing husk leaf), models learned for  
705 more distant phenotypes such as plant height and ear length at sampling time did not  
706 perform well. This discrepancy between the (Azodi et al., 2020) study and ours  
707 suggests that intermediate phenotypes may be inherently less predictable than final  
708 phenotypes, unless the plant material profiled is directly associated with the  
709 phenotype under study. Follow-up experiments will be necessary to assess whether  
710 individual plant datasets can be used as efficiently as genomic prediction datasets  
711 (Azodi et al., 2020) for predicting final plant phenotypes from molecular data profiled  
712 at an earlier developmental stage.

713 Together, our results show that profiling individual plants in the field is a promising  
714 addition to the toolbox we have at our disposal to study the molecular wiring of plants  
715 and relationships between genes and phenotypes, in particular in a field context.  
716 More steps will have to be taken however to realize the full potential of this new  
717 experimental design. A major bottleneck in all transcriptome profiling-based  
718 strategies to associate genes with phenotypes, not only the single-plant setup but  
719 also TWAS and classical systems biology strategies, is that the models they produce  
720 are correlational rather than causal in nature. A shift to more causal modeling  
721 approaches is direly needed, but not straightforward, as causal inference from the  
722 high-dimensional datasets generated by transcriptome profiling, which are frequently  
723 observational in nature and contain lots of hidden variables and confounders, is  
724 notoriously difficult. Profiling additional data layers in the single-plant setup, such as  
725 micro-environmental variables, may further improve modeling performance and  
726 enhance causal interpretability.

727 Up to now, we only profiled a limited amount of plants of one cultivar in one season  
728 and field environment. It remains to be seen to what extent the resulting models can

729 be generalized to other cultivars and growth environments. The fact that the single-  
730 plant setup only profiles one specific cultivar at a time may be seen as a  
731 disadvantage with respect to the classical TWAS setup, in which multiple cultivars  
732 are modeled simultaneously. On the other hand, as the phenotypic effects of  
733 expression variants often depend on the genetic background (epistasis) and  
734 environment in which they are introduced, it might in fact make sense to study the  
735 molecular wiring of a trait in a specific cultivar and environment before attempting  
736 generalizations to other cultivars or growth environments, in particular for plant  
737 species with large pan-genomes such as maize (Gore et al., 2009; Hirsch et al.,  
738 2014; Lu et al., 2015). The single-plant setup might for instance be used for studying  
739 an elite cultivar directly in a target field environment in which yield or stress tolerance  
740 improvements are desired.

741

742

743

744

## 745 **METHODS**

### 746 **Field trial setup, sampling and phenotyping**

747 During the summer of 2015, 560 B104 maize inbred plants were grown under  
748 'uncontrolled' field conditions at a site in Zwijnaarde, Belgium (51°00'35.2"N,  
749 3°42'56.5"E) with a sowing density of approximately 177,778 plants per hectare.  
750 Plants were sown by hand in ten adjacent rows of 5.5 m length, 75 cm apart and  
751 each containing 56 maize B104 plants. To the North and West of the B104 plants the  
752 commercial hybrid 'Ricardino' was sown, while to the East more B104 plants were  
753 grown and to the South other hybrids and recombinant inbred lines were grown,  
754 separated from the B104 plants by a 2.5 m-wide path (Figure 1A).

755 In total, 200 non-border plants that exhibited a primary ear at leaf 16 were harvested  
756 at the VT (tasseling) stage. Since not all plants reached this stage at the same time,  
757 plants were harvested on two different dates, 2015-08-25 (164 plants) and 2015-09-  
758 02 (36 plants). On each of these days, harvesting and sampling occurred from 10 am

759 until noon. Damaged plants were discarded to avoid outliers in the data. The position  
760 in the field was recorded for the harvested plants, and plant height was measured  
761 from the plant base to the collar of the top leaf. The primary ear leaf (leaf 16) of each  
762 selected plant was cut off at the ligule. Leaf 16 blade length was measured from the  
763 ligule to the tip of the leaf while leaf 16 blade width was measured in the middle  
764 between the ligule and the leaf tip. For molecular data generation, a 10 cm-long part  
765 of the leaf was cut from the middle of the leaf 16 blade, the midrib was removed (to  
766 avoid detection of exogenous metabolites during untargeted metabolite profiling) and  
767 the resulting mature leaf samples were stored in liquid nitrogen on the field. Primary  
768 ears were also cut off from the plants, and the length of the ears and husk leaves  
769 (from base to tip) was measured on the field.

## 770 **RNA sequencing**

771 Sixty of the 200 leaf samples for individual plants were randomly selected for RNA  
772 sequencing. Total RNA was isolated with the guanidinium thiocyanate-phenol-  
773 chloroform extraction method using TRI-reagent (Sigma-Aldrich). Total RNA was  
774 sent to GATC Biotech for RNA-sequencing. Library preparation was done using the  
775 NEBNext Kit (Illumina). In brief, purified poly(A)-containing mRNA molecules were  
776 fragmented, randomly primed strand-specific cDNA was generated and adapters  
777 were ligated. After quality control using an Advanced Analytical Technologies  
778 Fragment Analyzer, clusters were generated through amplification using cBOT  
779 (Cluster Kit v4, Illumina), followed by sequencing on an Illumina HiSeq2500 with the  
780 TruSeq SBS Kit v3 (Illumina). Sequencing was performed in paired-end mode with a  
781 read length of 125 bp.

782 The raw RNA-seq data was processed using a custom Galaxy pipeline (Goecks et  
783 al., 2010) implementing the following steps. First, the fastq files were quality-checked  
784 using FastQC (v:0.5.1) (Andrews, 2010). Next, Trimmomatic (v:0.32.1) (Bolger et al.,  
785 2014) was used to remove adapters, read fragments with average quality below 10  
786 and trimmed reads shorter than 20 base pairs. The trimmed and filtered reads were  
787 mapped against the *Zea mays* AGP genome annotation v:3.23 (Schnable et al.,  
788 2009) using GSNAP v:2013-06-27 (Wu and Nacu, 2010). A k-mer size of 12 was  
789 used, the 'local novel splicing event' parameter was set to 50,000, and default values  
790 were used for the rest of the parameters. The option for splitting the bam files into

791 unique and multiple alignments was activated, and only the uniquely mapping reads  
792 were kept for the following analyses. The mapping files were quantified using HTSeq  
793 v:0.6.1p1 (Anders et al., 2015) with the option 'Intersection-strict' and using the *Zea*  
794 *mays* AGP genome annotation v:3.23 (Schnable et al., 2009). The resulting raw  
795 counts were filtered to only keep genes with at least 5 counts per million in at least 1  
796 sample. Then, raw counts were divided by size factors calculated by DEseq2  
797 (v:1.14.1) (Love et al., 2014), resulting in library size-corrected gene expression  
798 values for 18,171 genes across 60 plants. Pseudocounts of  $0.5\delta$ , with  $\delta$  the smallest  
799 non-zero value in the normalized expression matrix, were added to all gene  
800 expression values. For all downstream analyses except coefficient of variation (CV)  
801 calculations, the resulting expression matrix was  $\log_2$ -transformed.

## 802 **Metabolome Profiling**

803 Fifty of the 60 leaf samples selected for RNA sequencing were additionally  
804 metabolome-profiled. For metabolome analysis, 100 mg of frozen, grinded mature  
805 leaf 16 material for the selected maize plants was sent to Metabolon Inc. (Durham,  
806 NC, USA). Sample extracts were prepared using the automated MicroLab STAR®  
807 system from Hamilton Company and divided into five fractions. Samples were  
808 normalized based on dry weight and further processed and analyzed by Metabolon  
809 for untargeted metabolic profiling involving a combination of four independent  
810 approaches: two separate reverse phase (RP)/UPLC-MS/MS analyses with positive  
811 ion mode electrospray ionization (ESI), RP/UPLC-MS/MS analysis with negative ion  
812 mode ESI and HILIC/UPLC-MS/MS analysis with negative ion mode ESI. All  
813 methods utilized a Waters ACQUITY ultra-performance liquid chromatographer  
814 (UPLC) and a Thermo Scientific Q-Exactive high resolution/accuracy mass  
815 spectrometer interfaced with a heated electrospray ionization (HESI-II) source and an  
816 Orbitrap mass analyzer operated at a mass resolution of 35,000. Sample extracts  
817 were dried and then reconstituted in solvents compatible to each of the four methods.  
818 Each reconstitution solvent contained a series of standards at fixed concentrations to  
819 ensure injection and chromatographic consistency. One aliquot was analyzed using  
820 acidic positive ion conditions, chromatographically optimized for more hydrophilic  
821 compounds. In this method, the extract was gradient eluted from a C18 column  
822 (Waters UPLC BEH C18-2.1x100 mm, 1.7  $\mu$ m) using water and methanol, containing  
823 0.05% perfluoropentanoic acid (PFPA) and 0.1% formic acid (FA). Another aliquot

824 was analyzed using acidic positive ion conditions, chromatographically optimized for  
825 more hydrophobic compounds. In this method, the extract was gradient eluted from  
826 the same aforementioned C18 column using methanol, acetonitrile, water, 0.05%  
827 PFPA and 0.01% FA and was operated at an overall higher organic content. Another  
828 aliquot was analyzed using basic negative ion optimized conditions using a separate  
829 dedicated C18 column. The basic extracts were gradient eluted from the column  
830 using methanol and water, however with 6.5mM Ammonium Bicarbonate at pH 8.  
831 The fourth aliquot was analyzed via negative ionization following elution from a HILIC  
832 column (Waters UPLC BEH Amide 2.1x150 mm, 1.7  $\mu$ m) using a gradient consisting  
833 of water and acetonitrile with 10mM Ammonium Formate, pH 10.8. The MS analyses  
834 alternated between MS and data-dependent MS scans using dynamic exclusion.  
835 The scan range varied slightly between methods but covered 70-1,000 m/z. Raw  
836 data was extracted, peak-identified and QC processed using Metabolon's hardware  
837 and software. Compounds were identified by comparison to library entries of more  
838 than 3,300 purified standards or recurrent unknown entities. Metabolon's library was  
839 based on authenticated standards that contain the retention time/index (RI), mass to  
840 charge ratio (m/z), and chromatographic data (including MS/MS spectral data) of all  
841 molecules present in the library.

842 The metabolite profiles used in the downstream analyses were obtained from the raw  
843 data delivered by Metabolon Inc. as follows.  $\text{Log}_2$  transformation was applied to the  
844 initial matrix containing the levels of 601 metabolites across 50 samples. Outliers  
845 were identified iteratively using two-tailed Grubbs tests (threshold for outlier detection  
846 was  $p = 0.01$ ) and converted to missing values (NA). Metabolites with missing values  
847 for more than half of the samples were removed, resulting in a matrix containing the  
848 levels of 592 metabolites across 50 samples. To deal with residual missing values,  
849 imputation was performed using Bayesian principal component analysis (BPCA) with  
850 48 components (using the `pca` function of the `pcaMethods` R package, v:1.76.0 with  
851 `method="bpca"`, `scaling="uv"` (unit variance), `npcs=48`). Finally, quantile normalization  
852 was applied to give each sample the same data distribution. This matrix was used for  
853 downstream analysis, except for CV calculations where the raw metabolite values  
854 were used instead.

## 855 **Clustering analyses**

856 The transcriptome and metabolome datasets were z-scored and jointly clustered  
857 using the ward.D2 hierarchical clustering method (Murtagh and Legendre, 2014)  
858 included in the R stats package (v:3.6.0), and using squared Euclidean distance as  
859 the distance measure. The same protocol was used for clustering the RNA-seq  
860 datasets sampled from the Short Read Archive v. 2018/01/30 (Leinonen et al., 2011)  
861 (see further). Additionally, the single-plant transcriptome dataset was analyzed using  
862 the biclustering algorithms ISA (Bergmann et al., 2003), SAMBA (Tanay et al., 2002),  
863 both part of EXPANDER v:7.1 (Hait et al., 2019), and ENIGMA v:1.1 (Maere et al.,  
864 2008). For biclustering, the  $\log_2$  expression values were transformed to  $\log_2$  fold  
865 changes with respect to the mean  $\log_2$  gene expression across the individual plants.  
866 Default parameters were used for running ISA. For SAMBA, default parameter  
867 settings were used except for the setting '*use option files of type*' = valsp\_3ap. For  
868 ENIGMA, default parameters were used, except for '*fdr*'=0.001, '*fdrBiNGO*'=0.01,  
869 '*namespaces*'=biological\_process and '*pvalThreshold*' = 0.6296976. The latter  
870 threshold is the standard deviation of the  $\log_2$  fold changes across the entire RNA-  
871 seq dataset, which, by lack of differential expression *p*-values for the single plants, is  
872 used by ENIGMA as a threshold for discretizing transcript  $\log_2$  fold changes into the  
873 categories 'upregulated', 'downregulated' and 'unchanged'.

## 874 **Gene Ontology (GO) enrichment analyses**

875 The gene ontology file used for GO enrichment analyses was downloaded on 30<sup>th</sup>  
876 August 2016 from the Gene Ontology website (The Gene Ontology Consortium,  
877 2017). A GO annotation file for AGP maize genome version 3.23 was parsed from  
878 the functional annotations provided by PLAZA (Proost et al., 2015), development  
879 version cnb 02, on 27<sup>th</sup> November 2017. To ensure that all the functional annotations  
880 found for the genes in the AGP maize genome version 2 were included in our  
881 analyses, we also included the maize gene functional annotations provided by the  
882 older PLAZA 3.0 platform (Proost et al., 2015), taking into account gene identifier  
883 changes from maize genome version 2 to version 3 as recorded in MaizeGDB  
884 (Portwood et al., 2018). Given the lack of maize genes annotated to the C<sub>4</sub>  
885 photosynthesis category in GO, we manually added annotations to this category for  
886 78 genes identified as C<sub>4</sub> genes by Li et al. (2010). In all GO enrichment analyses,



887 enrichment  $p$ -values were calculated using hypergeometric tests and adjusted for  
888 multiple testing ( $q$ -values) using the Benjamini-Hochberg (BH) procedure (Benjamini  
889 and Hochberg, 1995), which controls the false discovery rate (FDR). For GO  
890 enrichment analyses on (bi)clustering results, multiple testing correction was done for  
891 each cluster separately. Genes annotated to the categories ‘*DNA binding*  
892 *transcription factor activity*’ (GO:0003700), ‘*signal transducer activity*’ (GO:0004871)  
893 and ‘*regulation of transcription - DNA-templated*’ (GO:0006355) were combined in a  
894 list of potential regulators (Supplemental Data Set 16), for use in the ENIGMA  
895 analysis, the literature screen for evidence supporting our gene function predictions,  
896 and some of the phenotype prediction models, namely those that use a predefined  
897 list of regulators as potential predictors (see further).

### 898 **Spatial autocorrelation analyses and correlation network generation**

899 Spatially autocorrelated transcripts, metabolites and phenotypes were detected using  
900 Moran’s  $I$  with an inverse distance-weighted matrix in the Ape package (v:5.2) in R  
901 (v:3.6.0) (Paradis and Schliep, 2018). The  $p$ -values computed by the Ape package  
902 were adjusted for multiple testing with the BH method. The z-scored profiles of all  
903 transcripts with  $q \leq 0.01$  were assigned to clusters using the Tight Clustering  
904 algorithm (Tseng and Wong, 2005) (parameters: seed = 1, kmin = 35, nstart = 50,  
905 resamp = 10). Associations between a given spatially autocorrelated transcript  
906 cluster and any phenotypes were assessed by testing for Pearson correlation  
907 between the average z-scored gene expression profile of the cluster and the  
908 phenotype profiles. The resulting  $p$ -values were corrected per phenotype using the  
909 BH method.

910 For each pair of genes  $x$  and  $y$  in the single-plant transcriptome dataset, a ‘spatially  
911 adjusted Pearson correlation’ was computed by z-scoring the  $\log_2$  gene expression  
912 profiles of both genes and fitting the following model to the data:

$$y = \beta x + \varepsilon$$

913 with  $\beta$  the correlation coefficient and  $\varepsilon$  an error term with a spherical covariance  
914 structure. That is,  $\varepsilon$  is assumed to follow a 60-dimensional (= number of plant  
915 samples) multivariate normal distribution with mean zero and a covariance matrix  
916 given by:

$$\text{cov}(i, j) = \sigma^2 \times (n + (1 - n) \times \text{corSpher}(i, j))$$



917 where  $\sigma$  is the magnitude of the noise (comparable to the standard deviation of an  
918 independent normal distribution), the nugget  $n$  determines which proportion of the  
919 residuals is governed by spatial auto-covariance, and  $\text{corSpher}(i, j)$  is given by:

$$\text{corSpher}(i, j) = \begin{cases} d_{ij} < r, & 1 - 1.5 \times d_{ij}/r + 0.5 \times \left(d_{ij}/r\right)^3 \\ d_{ij} \geq r, & 0 \end{cases}$$

920 with  $d_{ij}$  the physical distance between plants  $i$  and  $j$  in the field. The range parameter  $r$   
921 is related to the distance at which two plants become independent of one another.  
922 The spherical covariance structure was chosen as it gave the most meaningful range  
923 estimates (within bounds of the field when  $n \neq 1$ ) and the best overall performance as  
924 measured by the Bayesian Information Criterion (BIC). All four parameters ( $\beta$ ,  $r$ ,  $n$ ,  $\sigma$ )  
925 were optimized with restricted maximum likelihood optimization using the nlme  
926 package (Linear and Nonlinear Mixed Effects Models, v:3.1-140) (Pinheiro et al.,  
927 2019) in R (v:3.6.0). Although there is an asymmetry in the regression equation,  
928 swapping  $x$  and  $y$  for gene pairs with a range estimate  $r$  above zero gave parameter  
929 estimates that were not meaningfully different.

930 For most gene pairs  $r$  converged to zero or  $n$  converged to 1, which means the best-  
931 fit model is one without spatial covariance, yielding the exact same correlation  
932 coefficient  $\beta$  and corresponding  $p$ -value as a normal ordinary least-squares (OLS)  
933 regression or Pearson correlation on the z-scored variables (up to rounding errors).  
934 Only for about 10% of the gene pairs,  $r$  converged to a non-zero distance. This  
935 means that for about 10% of gene pairs, there would be spatial structure left in the  
936 residuals of an OLS regression, violating the assumption of independence in OLS  
937 regression. All  $p$ -values were Bonferroni-corrected, and correlations with corrected  $p$ -  
938 values  $\leq 0.01$  were included as edges in the correlation network.

939 The correlation network obtained from the single-plant datasets was compared with  
940 networks obtained from traditional RNA-seq datasets sampled from the Short Read  
941 Archive v. 2018/01/30 (Leinonen et al., 2011). The raw RNA-seq data downloaded  
942 from the SRA in first instance involved all transcriptome data on *Zea mays* profiled  
943 with Illumina sequencing platforms. Only runs profiling mRNA (as opposed to e.g.  
944 small RNAs) with an average read length  $> 30$  bp and  $\geq 4 \cdot 10^6$  reads were retained. In  
945 many cases, the meta-information obtained from SRA did not specify the genotype

946 and tissue profiled in the RNA-seq experiments. We therefore used information from  
947 the BioSample database (<https://www.ebi.ac.uk/biosamples/>, v. 2018/02/28) to select  
948 only RNA-seq datasets produced on leaves of the maize inbred line B73, discarding  
949 crosses, mutants and NILS. Only samples with a unique BioSample ID were retained  
950 to avoid data replication. This led to a compendium of 470 unique RNA-seq samples  
951 (Supplemental Data Set 8), which were preprocessed and normalized in the same  
952 way as the single-plant samples. As an additional data quality filtering step, samples  
953 with <80% uniquely mapping reads, samples with a clearly divergent data distribution  
954 and samples with less than 20,000 expressed genes were discarded. This resulted in  
955 a compendium of 407 RNA-seq samples, which we randomly sampled without  
956 replacement to extract 500 compendia of 60 samples. For each of these randomly  
957 sampled compendia, a correlation network was built using Pearson correlation. Note  
958 that in contrast to the single-plant dataset, spatial autocorrelation correction is not  
959 necessary for the datasets sampled from SRA. Every sampled network was  
960 thresholded to obtain the same number of edges as obtained for the single-plant  
961 network.

## 962 **Gene function prediction**

963 Gene functions (GO Biological Process annotations) were predicted from the single-  
964 plant correlation network and all 500 sampled networks using a command-line  
965 version of PiNGO (v:1.11) (Smoot et al., 2011). PiNGO predicts the function of a  
966 given gene based on the GO annotations of its neighbors in a given network, using  
967 hypergeometric GO enrichment tests on the gene's network neighborhood. The  
968 resulting  $p$ -values were adjusted for multiple testing (for each input network  
969 separately) using the BH method. The overall function prediction performance of the  
970 single-plant and sampled networks was calculated as in (Bhosale et al., 2013). Recall  
971 and precision of the functional predictions for a given gene in a given network were  
972 calculated as described by (Deng et al., 2004) using the known maize GO  
973 annotations as gold standard, and the overall recall and precision values for the  
974 given network were obtained by averaging across all genes in the network. Next to  
975 this overall analysis of gene function prediction performance, we also assessed how  
976 accurately the networks predicted genes involved in specific GO Biological  
977 Processes. For these analyses, recall ( $R$ ) and precision ( $P$ ) were calculated in the  
978 traditional way as  $R = tp/(tp + fn)$  and  $P = tp/(tp + fp)$  with  $tp$  the number of true

979 positives,  $fp$  the number of false positives and  $fn$  the number of false negatives  
980 identified.

981 For every GO category and overall, the recall, precision, and  $F$ -measure (harmonic  
982 mean of recall and precision) of the predictions were calculated for every network at  
983 prediction  $q$ -value thresholds ranging from  $10^{-2}$  to  $10^{-11}$ . Undefined precisions and  $F$ -  
984 measures, resulting from a network not producing any predictions at a given  $q$ -value  
985 threshold, were set to 0 in order to reflect poor performance of the network at the  $q$ -  
986 value concerned. The relative prediction performance of the single-plant network with  
987 respect to the sampled networks was classified as very good, good, average, poor,  
988 or very poor based on the root mean square deviation of the single-plant network  $F$ -  
989 measures from the 25th, 50th, and 75th percentiles of the sampled network  $F$ -  
990 measures over the FDR subrange in which either the single-plant network or at least  
991 250 of the 500 sampled networks, or both, exhibited non-zero  $F$ -measures.

## 992 **Predictive models for phenotypes**

993 Phenotypes were regressed on the expression of single genes using a mixed model  
994 with the following formulation:

$$y = \beta_0 + \beta x + \varepsilon$$

995 with  $x$  the  $\log_2$  expression of a given gene and  $y$  the phenotype value. The error  $\varepsilon$  is  
996 assumed to follow a multivariate normal distribution with a rational quadratic  
997 distance-based covariance function. That is, the covariance of  $\varepsilon$  is described by:

$$\text{cov}(i, j) = \sigma^2 \times (n + (1 - n) \times \text{corRatio}(i, j))$$

998 Where  $\sigma$  is the magnitude of the noise and  $n$  determines which proportion of the  
999 residuals is governed by spatial auto-covariance. The correlation function  
1000  $\text{corRatio}(i, j)$  between two samples  $i$  and  $j$  is given by:

$$\text{corRatio}(i, j) = 1 / \left( 1 + \left( d_{ij} / r \right)^2 \right)$$

1001 with  $d_{ij}$  the physical distance between plants  $i$  and  $j$  in the field. The range parameter  $r$   
1002 is related to the distance at which two plants become independent of one another.  
1003 The ratio kernel was chosen because it gave meaningful range estimates

1004 (Supplemental Figure 6) and the best overall performance as measured by BIC.  
1005 Regression analyses were performed using the nlme package (v:3.1-140)(Pineiro et  
1006 al., 2019) in R (v:3.6.0). *p*-values were adjusted for each phenotype separately using  
1007 the BH method.

1008 Elastic net and random forest methods were used to learn multi-feature predictive  
1009 models for the phenotypes using transcript levels, metabolite levels or both as  
1010 features. Elastic net and random forest models were also built using as features only  
1011 the transcript levels of a predefined set of regulators (Supplemental Data Set 16).  
1012 Both types of models were built with the scikit-learn package (v:0.21.0) (Pedregosa  
1013 et al., 2011) in Python. For elastic net models, the maximum number of iterations  
1014 (parameter '*max\_iter*') was set to  $10^6$ . For random forest models, the number of  
1015 estimators, i.e. the number of averaged trees, was set to 500, the '*criterion*'  
1016 parameter was set to 'mse' and the '*bootstrap*' parameter was set to 'True'. For each  
1017 phenotype, models were built with each method on each feature set using 10-fold  
1018 nested cross-validation. For each of the 10 outer folds, 4 inner folds were used to  
1019 tune the model hyperparameters (the shrinkage parameter  $\alpha$  and the L1-ratio  $\rho$  for  
1020 elastic nets ; the '*max\_features*' parameter with possible values 'sqrt', 0.33, 'log2' and  
1021 'None' and the '*min\_samples\_split*' parameter with possible value 2, 3, 4 and 5 for  
1022 random forests). After completing the inner cross-validation, the combination of  
1023 hyperparameters that scored best on test data across the 4 folds were used to retrain  
1024 the model on all 4 folds combined, yielding 10 trained models with optimized  
1025 hyperparameters per phenotype (GridSearchCV function in scikit-learn). Each of the  
1026 10 models was used to predict the phenotypes of the 6 hold-out samples for the fold  
1027 it was trained on, yielding 60 'test data' predictions in total, one for each sample.

1028 The 'out-of-bag' (oob)  $R^2$  score, defined as  $R^2 = 1 - \sum(y_i - \hat{y}_i)^2 / \sum(y_i - \bar{y})^2$  where  
1029  $\hat{y}_i$  and  $y_i$  are the predicted and observed phenotypes for sample  $i$ , respectively, and  
1030 where  $\bar{y}$  is the mean of the observed phenotypes, was used to measure how well the  
1031 predictions align with the true phenotypes. Note that the meaning of this oob  $R^2$  is  
1032 different from the classical meaning of  $R^2$ , which is the percentage of variance  
1033 explained by a linear model. As opposed to the classical  $R^2$ , the oob  $R^2$  can become  
1034 negative when the sum of squared errors (numerator) is larger than the variance of  
1035 the data (denominator). When all predictions  $\hat{y}_i$  equal the mean  $\bar{y}$ , the oob  $R^2$  equals  
1036 zero. A negative oob  $R^2$  score indicates that the model does worse than assigning

1037 the mean phenotype value of the training samples to the unseen samples. Positive  
1038 oob  $R^2$  scores indicate that the model does better than predicting the mean, and a  
1039 model that perfectly predicts the unseen phenotypes has an oob  $R^2$  score of one. We  
1040 report two oob  $R^2$  scores for each model, the ‘pooled  $R^2$ ’ score and the ‘median  $R^2$ ’  
1041 score. For calculating the pooled  $R^2$ , the test set predictions of all folds were taken  
1042 into account together to calculate one oob  $R^2$  value that summarizes all folds. The  
1043 ‘median  $R^2$ ’ score is the median of the oob  $R^2$  scores calculated for each fold  
1044 independently.

1045 For modeling methods that use built-in feature selection/reduction techniques, such  
1046 as elastic nets and random forests, an analytical statistical framework to assess  
1047 whether models perform better than expected by chance is lacking. A typical solution  
1048 used is to compute empirical  $p$ -values by applying the same data analysis to a large  
1049 number of datasets that follow the null hypothesis of no relation between the  
1050 dependent and independent variables, and comparing the parameter values and  
1051 performance measures of the model to their empirical null distributions (Ojala and  
1052 Garriga, 2010; Steinfath et al., 2010; Riedelsheimer et al., 2012). 500 datasets  
1053 following the null hypothesis of no relation between gene expression and phenotypes  
1054 were generated by randomly permuting the phenotypes among the 60 plants. The  
1055 following formula (Ojala and Garriga, 2010) was used to calculate  $p$ -values for the  
1056 original oob  $R^2$  scores:

$$p = \frac{n + 1}{k + 1}$$

1057 Where  $n$  is the number of times that a permuted model gave an equal or better  $R^2$   
1058 score than the ‘true’ model. Following (Ojala and Garriga, 2010), the standard  
1059 deviation on the empirical  $p$ -value can be calculated as  $\sqrt{\frac{p^*(1-p^*)}{k}}$ , where  $k$  is the  
1060 number of permutations and  $p^*$  is the true  $p$ -value. This underlying true  $p$ -value is  
1061 unknown, but at the critical  $p^* = 0.05$ , the calculated standard deviation on the  
1062 empirical  $p$ -value when using 500 permutations is 0.0097, which is sufficiently low for  
1063 our purposes.

#### 1064 **Accession Numbers**

1065 RNA-seq data have been deposited in the ArrayExpress database at EMBL-EBI  
1066 ([www.ebi.ac.uk/arrayexpress](http://www.ebi.ac.uk/arrayexpress)) under accession number E-MTAB-8944. Sequence

1067 data from this article can be found in the Maize Genetics and Genomics Database  
1068 (MaizeGDB) or GenBank/ EMBL databases under the following accession numbers:  
1069 MADS1 (GRMZM2G171365), hb126 (GRMZM2G034113), WRKY53  
1070 (GRMZM2G012724), WRKY92 (GRMZM2G449681), AP2-EREBP  
1071 (GRMZM2G042756), WRKY40 (GRMZM2G120320), XLG3b (GRMZM2G429113),  
1072 MPK3-1 (GRMZM2G053987), TPS13.1 (GRMZM2G416836), CSP41A  
1073 (GRMZM2G111216), CRB (GRMZM2G165655), SIG5 (GRMZM2G543629), prh2  
1074 (GRMZM2G140288), hb26 (GRMZM2G010929), PHR2 (GRMZM2G158662),  
1075 ZMM15 (GRMZM2G553379), ZAP1 (GRMZM2G148693), unknown  
1076 (GRMZM2G023625), unknown (GRMZM2G377311), MPK14 (GRMZM2G062914),  
1077 unknown (GRMZM2G430780)

#### 1078 **Supplemental Data**

1079 **Supplemental Data Set 1.** Transcriptome, metabolome, field position and phenotype  
1080 data for the individual plants profiled in this study.

1081 **Supplemental Data Set 2.** Spatially autocorrelated transcripts, metabolites and  
1082 phenotypes in the single-plant dataset.

1083 **Supplemental Data Set 3.** Spatially autocorrelated gene clusters in the single-plant  
1084 dataset.

1085 **Supplemental Data Set 4.** Significant correlations between the average expression  
1086 profiles of spatially autocorrelated gene clusters and phenotypes.

1087 **Supplemental Data Set 5.** Gene expression statistics for single-plant dataset.

1088 **Supplemental Data Set 6.** Functional enrichment analysis of variably and stably  
1089 expressed genes.

1090 **Supplemental Data Set 7.** GO enrichment analysis of clusters and biclusters  
1091 obtained from the single-plant transcriptome data.

1092 **Supplemental Data Set 8.** List of Sequence Read Archive (SRA) samples used to  
1093 calculate sampled networks.

1094 **Supplemental Data Set 9.** List of target GO terms used for category-specific gene  
1095 function predictions.

1096 **Supplemental Data Set 10.** Gene function prediction performance plots for the GO  
1097 categories listed in Supplemental Data Set 9.

1098 **Supplemental Data Set 11.** Novel gene function predictions based on the single-  
1099 plant co-expression network.

1100 **Supplemental Data Set 12.** Transcripts significantly correlated with plant  
1101 phenotypes.

1102 **Supplemental Data Set 13.** Elastic net and random forest feature importance scores  
1103 for blade length predictive models.

1104 **Supplemental Data Set 14.** Elastic net and random forest feature importance scores  
1105 for blade width predictive models.

1106 **Supplemental Data Set 15.** Elastic net and random forest feature importance scores  
1107 for husk leaf length predictive models.

1108 **Supplemental Data Set 16.** List of regulatory genes annotated to the GO categories  
1109 GO:0003700, GO:0006355 or GO:0004871.

## 1110 **ACKNOWLEDGEMENTS**

1111 The authors thank Alex de Vlieghe and his team from the Flanders Research  
1112 Institute for Agricultural, Fisheries and Food (ILVO) for field trial management.  
1113 Metabolomics data generation, funding for the RNA-seq experiments and funding for  
1114 DH and TVH were provided by Syngenta Crop Protection, LLC. SDM is a fellow of  
1115 the Research Foundation - Flanders (FWO, grant 1146319N).

## 1116 **AUTHOR CONTRIBUTIONS**

1117 SM designed the study. SM and DI supervised the study. TVH, JDB, HN, DH and SM  
1118 performed the field trial and generated data. DFC, SDM, JA, HS, DH and SM  
1119 analyzed data. SM, DFC and SDM wrote the paper with input from the other authors.



## 1120 **FIGURE LEGENDS**

1121

1122 **Figure 1. Field trial design and exploratory data analysis. (A)** Layout of the field  
1123 trial. A total of 560 *Zea mays* B104 plants were grown in a grid of 10 rows by 56  
1124 columns. Border rows 0 and 9 are not shown on the plot, and the dimensions on the  
1125 figure are not to scale. Phenotypic data was measured for 200 plants (p).  
1126 Transcriptome (RNA-seq) data was profiled for 60 out of those 200 plants (t+p).  
1127 Metabolome data is available for 50 out of those 60 plants (t+m+p). Some plants  
1128 were harvested later (see Methods), as indicated by a thicker cell border. **(B)** Plot  
1129 showing the first two principal components (PCs) in a PCA of the 60 single-plant  
1130 transcriptomes. **(C)** Plot showing the first two principal components (PCs) in a PCA of  
1131 the 50 single-plant metabolomes. **(D)** Plot showing the first two principal components  
1132 (PCs) in a PCA of the 200 plant phenomes. Light grey markers in panel **(D)** indicate  
1133 plants for which only phenotype information is available. Only plants for which  
1134 transcriptome data is available are numbered in plots **(B)-(D)**, according to the  
1135 numbering in panel **(A)**. Crosses in panels **(B)-(D)** indicate plants harvested on the  
1136 second harvest day.

1137

1138 **Figure 2. Transcriptomic, metabolic and phenotypic variability among**  
1139 **individual field-grown maize plants.** In panels **(A)** to **(E)**, violin plots show the  
1140 variability in continuous leaf 16, ear and plant height phenotypes among individual  
1141 plants. Panel **(F)** depicts the variability in harvesting date among plants, as well as  
1142 the variability in two discrete phenotypes, namely the number of leaves at harvest  
1143 and whether or not leaf 16 was kinked. Panel **(G)** shows violin plots for the  
1144 distribution of the coefficient of variance (CV) across the sampled plants for the levels  
1145 of individual transcripts and metabolites. For visualization purposes, the transcript CV  
1146 was capped at 2.0. In all violin plots, the median is indicated by the white circle. The  
1147 black box extends from the 25th to the 75th percentile, and black whiskers extend  
1148 from each end of the box to the most extreme values within 1.5 times the interquartile  
1149 range from the respective end. Data points beyond this range are shown as black  
1150 dots. The red open circle indicates the mean of the distribution, with red whiskers  
1151 extending to 1 standard deviation above and below the mean.

1152

1153 **Figure 3. Gene expression patterns in cluster 29 correlate with ear length.** The  
1154 top panel displays the average z-scored gene expression profile of spatially  
1155 autocorrelated gene cluster 29 (35 genes), mapped to the field. The bottom panel  
1156 displays the ear length phenotype on the field (only for plants that were transcriptome  
1157 profiled). Shown on top are the Pearson's correlation ( $r$ ) between the cluster 29  
1158 expression profile and ear length, the corresponding  $p$ -value (computed using  
1159 `cor.test` in R) and the corresponding  $q$ -value (computed using the Benjamini-  
1160 Hochberg method on all comparisons of cluster gene expression profiles with the ear  
1161 length profile). The scales on the top and to the right of the field maps give field plot  
1162 dimensions in cm.

1163

1164 **Figure 4. Example ENIGMA module learned from the single-plant transcriptome**  
1165 **dataset.** Yellow/blue squares indicate higher/lower gene expression with respect to  
1166 the average expression of a gene across plants. The bottom grid shows the  
1167 expression profiles of the module genes, while the top grid contains the expression  
1168 profiles of predicted regulators of the module. Significant co-differential expression  
1169 links between the regulators and the module genes are indicated in the red/green  
1170 matrix to the right (green = positively correlated, red = negatively correlated). Gene  
1171 names highlighted in red indicate regulators that are part of the module. Genes  
1172 indicated as core genes belong to the original module seed, other genes were  
1173 accreted by the seed in the course of module formation (Maere et al., 2008).  
1174 Enriched GO categories in the module gene set are displayed on the right, with  
1175 orange squares depicting which module genes are annotated to these GO  
1176 categories. This particular module is significantly enriched ( $q \leq 0.01$ ) in known  
1177 reproductive system development genes, mostly regulators.

1178

1179 **Figure 5. Global gene function prediction performance.** Panels **(A)** to **(D)** depict  
1180 the gene function prediction performance of the single-plant network (solid line) and  
1181 500 sampled networks (box-and-whisker plots) averaged across all genes in a given  
1182 network. Boxes extend from the 25th to the 75th percentile of the sampled networks,  
1183 with the median indicated by the central black line. Whiskers extend from each end of  
1184 the box to the most extreme values within 1.5 times the interquartile range from the  
1185 respective end. Data points beyond this range are displayed as open black circles.  
1186 Panels **(A)**, **(B)** and **(C)** respectively represent the recall, precision and F-measure of

1187 the network-based gene function predictions as a function of the prediction FDR  
1188 threshold ( $q$ ). Panel **(D)** depicts the number of gene functions predicted from each  
1189 network (predicted positives = true positives + false positives) as a function of the  
1190 prediction FDR threshold. As multiple gene functions can be predicted per gene, the  
1191 number of predicted positives is generally higher than the number of genes.

1192

1193 **Figure 6. Gene function prediction performance for specific GO categories.**

1194 Panels **(A)** to **(D)** show the gene function prediction performance of the single-plant  
1195 network versus sampled networks for GO categories related to abiotic stimulus  
1196 responses, development, biotic stimulus responses and hormone responses,  
1197 respectively. Categories are shown in the context of the GO hierarchy and colored  
1198 according to how well the single-plant network performs in comparison with 500  
1199 sampled networks (see Methods). Solid arrows represent direct parent-child  
1200 relationships in GO, dashed arrows represent indirect relationships. Grey nodes  
1201 depict untested GO categories. White nodes depict GO categories for which there  
1202 was insufficient information to score the performance of the single-plant network  
1203 versus the sampled networks, i.e. categories for which the single-plant network and  
1204 more than half of the sampled networks did not give rise to any predictions at  $q \leq$   
1205  $10e-2$ .

1206

1207 **Figure 7. Predictive models for leaf 16 blade length and width.** Graphs plotting  
1208 predicted versus measured phenotypes are shown for **(A)** the random forest model  
1209 for leaf 16 blade length using only transcript levels of regulators as predictors, and  
1210 **(B)** the e-net model for leaf 16 blade width using only transcript levels of regulators  
1211 as predictors. The dot colors represent different outer cross-validation folds. Perfect  
1212 predictions are located on the diagonal line in each panel.

1213

1214 **TABLES**

1215 **Table 1. Topological parameters for the single-plant and sampled expression**  
1216 **correlation networks.** The ‘predicted positives’ column indicates the amount of true  
1217 positive plus false positive predictions made by each type of network at  $q \leq 0.01$ .

|                       | # nodes | # edges | network density | average clustering coefficient | unannotated gene fraction | predicted positives |
|-----------------------|---------|---------|-----------------|--------------------------------|---------------------------|---------------------|
| single-plant network  | 10,951  | 771,610 | 0.012869        | 0.477319                       | 0.087024                  | 253,430             |
| sampled networks mean | 9,756   | 771,610 | 0.016831        | 0.475485                       | 0.090594                  | 152,427             |
| sampled networks sd   | 1,132   | 0       | 0.003635        | 0.022108                       | 0.004078                  | 23,167              |
| <i>p</i> -value       | 0.146   | -       | 0.146           | 0.476                          | 0.198                     | 0.002               |

1218

1219

1220

1221

1222

1223 **Table 2. Performance of e-net and random forest models for phenotype**  
 1224 **prediction.** Three different sections of the table show the pooled  $R^2$ , median  $R^2$  and  
 1225 Pearson correlation (PCC) measures for the prediction performance of the models  
 1226 learned for all phenotypes using all transcripts (Transcripts), only regulatory  
 1227 transcripts (Regulators), all metabolites (Metabolites), and both transcripts and  
 1228 metabolites (Both) as features. Numbers between parentheses indicate  $p$ -values for  
 1229 the oob  $R^2$  values obtained, derived from permutation tests. No permutation tests  
 1230 were performed for the ear length and plant height phenotypes, given the poor oob  
 1231  $R^2$  values of the models concerned.

| Pooled $R^2$            |               |               |               |               |                |
|-------------------------|---------------|---------------|---------------|---------------|----------------|
| Trait                   |               | Transcripts   | Regulators    | Metabolites   | Both           |
| <b>Blade 16 length</b>  | Elastic Net   | 0.345 (0.002) | 0.409 (0.002) | 0.412 (0.002) | 0.226 (0.004)  |
|                         | Random Forest | 0.567 (0.002) | 0.609 (0.002) | 0.323 (0.004) | 0.474 (0.002)  |
| <b>Blade 16 width</b>   | Elastic Net   | 0.659 (0.002) | 0.582 (0.002) | 0.611 (0.002) | 0.622 (0.002)  |
|                         | Random Forest | 0.274 (0.002) | 0.312 (0.002) | 0.388 (0.002) | 0.229 (0.004)  |
| <b>Husk leaf length</b> | Elastic Net   | 0.438 (0.002) | 0.445 (0.002) | 0.519 (0.002) | 0.412 (0.002)  |
|                         | Random Forest | 0.274 (0.002) | 0.337 (0.002) | 0.461 (0.002) | 0.315 (0.002)  |
| <b>Ear length</b>       | Elastic Net   | 0.057         | 0.084         | 0.082         | 0.129          |
|                         | Random Forest | 0.115         | 0.091         | 0.162         | 0.137          |
| <b>Plant height</b>     | Elastic Net   | -0.058        | -0.045        | -0.036        | -0.043         |
|                         | Random Forest | -0.061        | -0.059        | 0.008         | -0.096         |
| Median $R^2$            |               |               |               |               |                |
| Trait                   |               | Transcripts   | Regulators    | Metabolites   | Both           |
| <b>Blade 16 length</b>  | Elastic Net   | 0.234 (0.002) | 0.318 (0.002) | 0.314 (0.002) | -0.199 (0.471) |
|                         | Random Forest | 0.531 (0.002) | 0.534 (0.002) | 0.325 (0.004) | 0.379 (0.002)  |
| <b>Blade 16 width</b>   | Elastic Net   | 0.726 (0.002) | 0.582 (0.002) | 0.481 (0.002) | 0.641 (0.002)  |
|                         | Random Forest | 0.279 (0.002) | 0.322 (0.002) | 0.521 (0.002) | 0.192 (0.004)  |
| <b>Husk leaf length</b> | Elastic Net   | 0.501 (0.002) | 0.471 (0.002) | 0.295 (0.002) | 0.392 (0.002)  |
|                         | Random Forest | 0.280 (0.002) | 0.267 (0.002) | 0.431 (0.002) | 0.197 (0.002)  |
| <b>Ear length</b>       | Elastic Net   | 0.149         | 0.129         | -0.045        | -0.054         |
|                         | Random Forest | 0.122         | 0.029         | -0.047        | -0.154         |
| <b>Plant height</b>     | Elastic Net   | -0.205        | -0.169        | -0.433        | -0.336         |
|                         | Random Forest | -0.213        | -0.261        | -0.291        | -0.375         |
| PCC                     |               |               |               |               |                |
| Trait                   |               | Transcripts   | Regulators    | Metabolites   | Both           |
| <b>Blade 16 length</b>  | Elastic Net   | 0.592         | 0.641         | 0.645         | 0.477          |
|                         | Random Forest | 0.782         | 0.789         | 0.586         | 0.726          |
| <b>Blade 16 width</b>   | Elastic Net   | 0.821         | 0.765         | 0.784         | 0.808          |
|                         | Random Forest | 0.560         | 0.573         | 0.664         | 0.542          |
| <b>Husk leaf length</b> | Elastic Net   | 0.670         | 0.669         | 0.734         | 0.665          |
|                         | Random Forest | 0.605         | 0.630         | 0.704         | 0.638          |
| <b>Ear length</b>       | Elastic Net   | 0.295         | 0.304         | 0.299         | 0.361          |
|                         | Random Forest | 0.341         | 0.305         | 0.404         | 0.376          |
| <b>Plant height</b>     | Elastic Net   | -0.168        | -0.161        | 0.106         | -0.091         |
|                         | Random Forest | 0.021         | 0.053         | 0.160         | -0.105         |

## 1233 REFERENCES

- 1234 **Alexandersson, E., Jacobson, D., Vivier, M.A., Weckwerth, W., and Andreasson,**  
1235 **E.** (2014). Field-omics—understanding large-scale molecular data from field  
1236 crops. *Front. Plant Sci.* **5**, 286.
- 1237 **Alter, P., Bircheneder, S., Zhou, L.Z., Schlüter, U., Gahrtz, M., Sonnewald, U.,**  
1238 **and Dresselhaus, T.** (2016). Flowering time-regulated genes in maize include  
1239 the transcription factor ZmMADS1. *Plant Physiol.* **172**, 389-404.
- 1240 **Anders, S., Pyl, P.T., and Huber, W.** (2015). HTSeq—a Python framework to work  
1241 with high-throughput sequencing data. *Bioinformatics* **31**, 166-169.
- 1242 **Andrews, S.** (2010). FastQC: a quality control tool for high throughput sequence  
1243 data. <http://www.bioinformatics.babraham.ac.uk/projects/fastqc>.
- 1244 **Atkinson, N.J., and Urwin, P.E.** (2012). The interaction of plant biotic and abiotic  
1245 stresses: from genes to the field. *J. Exp. Bot.* **63**, 3523-3543.
- 1246 **Azodi, C.B., Pardo, J., VanBuren, R., de Los Campos, G., and Shiu, S.H.** (2020).  
1247 Transcriptome-based prediction of complex traits in maize. *Plant Cell* **32**, 139-  
1248 151.
- 1249 **Barah, P., Naika, M., Jayavelu, N.D., Sowdhamini, R., Shameer, K., and Bones,**  
1250 **A.M.** (2016). Transcriptional regulatory networks in *Arabidopsis thaliana*  
1251 during single and combined stresses. *Nucleic Acids Res.* **44**, 3147-3164.
- 1252 **Baute, J., Herman, D., Coppens, F., De Block, J., Slabbinck, B., Dell'Acqua, M.,**  
1253 **Pè, M.E., Maere, S., Nelissen, H., and Inzé, D.** (2015). Correlation analysis of  
1254 the transcriptome of growing leaves with mature leaf parameters in a maize  
1255 RIL population. *Genome Biol.* **16**, 168.
- 1256 **Baute, J., Herman, D., Coppens, F., De Block, J., Slabbinck, B., Dell'Acqua, M.,**  
1257 **Pè, M.E., Maere, S., Nelissen, H., and Inzé, D.** (2016). Combined large-scale  
1258 phenotyping and transcriptomics in maize reveals a robust growth regulatory  
1259 network. *Plant Physiol.* **170**, 1848-1867.
- 1260 **Benjamini, Y., and Hochberg, Y.** (1995). Controlling the false discovery rate: a  
1261 practical and powerful approach to multiple testing. *J. Roy. Stat. Soc. B Met.*  
1262 **57**, 289-300.
- 1263 **Bergmann, S., Ihmels, J., and Barkai, N.** (2003). Iterative signature algorithm for  
1264 the analysis of large-scale gene expression data. *Phys. Rev. E* **67**, 031902.
- 1265 **Bhosale, R., Jewell, J.B., Hollunder, J., Koo, A.J.K., Vuylsteke, M., Michoel, T.,**  
1266 **Hilson, P., Goossens, A., Howe, G.A., Browne, J., and Maere, S.** (2013).  
1267 Predicting gene function from uncontrolled expression variation among  
1268 individual wild-type *Arabidopsis* plants. *Plant Cell* **25**, 2865-2877.
- 1269 **Birkenbihl, R.P., Diezel, C., and Somssich, I.E.** (2012). *Arabidopsis* WRKY33 is a  
1270 key transcriptional regulator of hormonal and metabolic responses toward  
1271 *Botrytis cinerea* infection. *Plant Physiol.* **159**, 266-285.
- 1272 **Bolger, A.M., Lohse, M., and Usadel, B.** (2014). Trimmomatic: a flexible trimmer for  
1273 Illumina sequence data. *Bioinformatics* **30**, 2114-2120.
- 1274 **Brachi, B., Morris, G.P., and Borevitz, J.O.** (2011). Genome-wide association  
1275 studies in plants: the missing heritability is in the field. *Genome Biol.* **12**, 232.
- 1276 **Breiman, L.** (2001). Random forests. *Mach. Learn.* **45**, 5-32.
- 1277 **Brumos, J., Robles, L.M., Yun, J., Vu, T.C., Jackson, S., Alonso, J.M., and**  
1278 **Stepanova, A.N.** (2018). Local auxin biosynthesis is a key regulator of plant  
1279 development. *Dev. Cell* **47**, 306-318.e305.
- 1280 **Cabello, J.V., Lodeyro, A.F., and Zurbriggen, M.D.** (2014). Novel perspectives for  
1281 the engineering of abiotic stress tolerance in plants. *Curr. Opin. Biotech.* **26**,  
1282 62-70.



- 1283 **Cortijo, S., Aydin, Z., Ahnert, S., and Locke, J.C.** (2019). Widespread  
1284 inter-individual gene expression variability in *Arabidopsis thaliana*. *Mol. Syst.*  
1285 *Biol.* **15**, e8591.
- 1286 **Cui, X., Fan, B., Scholz, J., and Chen, Z.** (2007). Roles of *Arabidopsis* cyclin-  
1287 dependent kinase C complexes in cauliflower mosaic virus infection, plant  
1288 growth, and development. *Plant Cell* **19**, 1388-1402.
- 1289 **Davila Olivas, N.H., Kruijer, W., Gort, G., Wijnen, C.L., van Loon, J.J., and Dicke,**  
1290 **M.** (2017). Genome-wide association analysis reveals distinct genetic  
1291 architectures for single and combined stress responses in *Arabidopsis*  
1292 *thaliana*. *New Phytol.* **213**, 838-851.
- 1293 **Deng, M., Tu, Z., Sun, F., and Chen, T.** (2004). Mapping gene ontology to proteins  
1294 based on protein-protein interaction data. *Bioinformatics* **20**, 895-902.
- 1295 **Desta, Z.A., and Ortiz, R.** (2014). Genomic selection: genome-wide prediction in  
1296 plant improvement. *Trends Plant Sci.* **19**, 592-601.
- 1297 **Donaldson, M.E., Meng, S., Gagarinova, A., Babu, M., Lambie, S.C., Swiadek,**  
1298 **A.A., and Saville, B.J.** (2013). Investigating the *Ustilago maydis/Zea mays*  
1299 pathosystem: transcriptional responses and novel functional aspects of a  
1300 fungal calcineurin regulatory B subunit. *Fungal Genet. Biol.* **58-59**, 91-104.
- 1301 **Fernandez, O., Béthencourt, L., Quero, A., Sangwan, R.S., and Clément, C.**  
1302 (2010). Trehalose and plant stress responses: friend or foe? *Trends Plant Sci.*  
1303 **15**, 409-417.
- 1304 **Fleet, G.** (1991). Cell walls. In *The yeasts*, A. Rose and J. Harrison, eds (Academic  
1305 Press, New York), pp. 199-277.
- 1306 **Fountain, J.C., Rarung, Y., Luo, M., Brown, R.L., Guo, B., and Chen, Z.-Y.**  
1307 (2015). Potential roles of WRKY transcription factors in regulating host  
1308 defense responses during *Aspergillus flavus* infection of immature maize  
1309 kernels. *Physiol. Mol. Plant P.* **89**, 31-40.
- 1310 **Friso, G., Majeran, W., Huang, M., Sun, Q., and van Wijk, K.J.** (2010).  
1311 Reconstruction of metabolic pathways, protein expression, and homeostasis  
1312 machineries across maize bundle sheath and mesophyll chloroplasts: large-  
1313 scale quantitative proteomics using the first maize genome assembly. *Plant*  
1314 *Physiol.* **152**, 1219-1250.
- 1315 **Goecks, J., Nekrutenko, A., and Taylor, J.** (2010). Galaxy: a comprehensive  
1316 approach for supporting accessible, reproducible, and transparent  
1317 computational research in the life sciences. *Genome Biol.* **11**, R86.
- 1318 **Gore, M.A., Chia, J.M., Elshire, R.J., Sun, Q., Ersoz, E.S., Hurwitz, B.L., Peiffer,**  
1319 **J.A., McMullen, M.D., Grills, G.S., Ross-Ibarra, J., Ware, D.H., and**  
1320 **Buckler, E.S.** (2009). A first-generation haplotype map of maize. *Science* **326**,  
1321 1115-1117.
- 1322 **Gowik, U., Bräutigam, A., Weber, K.L., Weber, A.P.M., and Westhoff, P.** (2011).  
1323 Evolution of C<sub>4</sub> photosynthesis in the genus flaveria: how many and which  
1324 genes does it take to make C<sub>4</sub>? *Plant Cell* **23**, 2087-2105.
- 1325 **Guo, Z., Magwire, M.M., Basten, C.J., Xu, Z., and Wang, D.** (2016). Evaluation of  
1326 the utility of gene expression and metabolic information for genomic prediction  
1327 in maize. *Theor. Appl. Genet.* **129**, 2413-2427.
- 1328 **Hait, T.A., Maron-Katz, A., Sagir, D., Amar, D., Ulitsky, I., Linhart, C., Tanay, A.,**  
1329 **Sharan, R., Shiloh, Y., Elkon, R., and Shamir, R.** (2019). The EXPANDER  
1330 integrated platform for transcriptome analysis. *J. Mol. Biol.* **431**, 2398-2406.
- 1331 **Harper, A.L., Trick, M., Higgins, J., Fraser, F., Clissold, L., Wells, R., Hattori, C.,**  
1332 **Werner, P., and Bancroft, I.** (2012). Associative transcriptomics of traits in  
1333 the polyploid crop species *Brassica napus*. *Nat. Biotechnol.* **30**, 798-802.

- 1334 **Havlickova, L., He, Z., Wang, L., Langer, S., Harper, A.L., Kaur, H., Broadley,**  
1335 **M.R., Gegas, V., and Bancroft, I.** (2018). Validation of an updated  
1336 associative transcriptomics platform for the polyploid crop species *Brassica*  
1337 *napus* by dissection of the genetic architecture of erucic acid and tocopherol  
1338 isoform variation in seeds. *Plant J.* **93**, 181-192.
- 1339 **Hirsch, C.N., Foerster, J.M., Johnson, J.M., Sekhon, R.S., Muttoni, G.,**  
1340 **Vaillancourt, B., Peñagaricano, F., Lindquist, E., Pedraza, M.A., Barry, K.,**  
1341 **de Leon, N., Kaeppler, S.M., and Buell, C.R.** (2014). Insights into the maize  
1342 pan-genome and pan-transcriptome. *Plant Cell* **26**, 121-135.
- 1343 **Hu, L., Ye, M., Li, R., and Lou, Y.** (2016). OsWRKY53, a versatile switch in  
1344 regulating herbivore-induced defense responses in rice. *Plant Signal. Behav.*  
1345 **11**, e1169357.
- 1346 **Huang, X., and Han, B.** (2014). Natural variations and genome-wide association  
1347 studies in crop plants. *Annu. Rev. Plant Biol.* **65**, 531-551.
- 1348 **John, C.R., Smith-Unna, R.D., Woodfield, H., Covshoff, S., and Hibberd, J.M.**  
1349 (2014). Evolutionary convergence of cell-specific gene expression in  
1350 independent lineages of C<sub>4</sub> grasses. *Plant Physiol.* **165**, 62-75.
- 1351 **Johnson, S.M., Lim, F.-L., Finkler, A., Fromm, H., Slabas, A.R., and Knight, M.R.**  
1352 (2014). Transcriptomic analysis of *Sorghum bicolor* responding to combined  
1353 heat and drought stress. *BMC Genomics* **15**, 456.
- 1354 **Koprivova, A., Harper, A.L., Trick, M., Bancroft, I., and Kopriva, S.** (2014).  
1355 Dissection of the control of anion homeostasis by associative transcriptomics  
1356 in *Brassica napus*. *Plant Physiol.* **166**, 442-450.
- 1357 **Korte, A., and Farlow, A.** (2013). The advantages and limitations of trait analysis  
1358 with GWAS: a review. *Plant Methods* **9**, 29.
- 1359 **Kremling, K.A.G., Diepenbrock, C.H., Gore, M.A., Buckler, E.S., and Bandillo,**  
1360 **N.B.** (2019). Transcriptome-wide association supplements genome-wide  
1361 association in *Zea mays*. *G3-Genes Genom. Genet.* **9**, 3023-3033.
- 1362 **Latgé, J.-P.** (2007). The cell wall: a carbohydrate armour for the fungal cell. *Mol.*  
1363 *Microbiol.* **66**, 279-290.
- 1364 **Leinonen, R., Sugawara, H., and Shumway, M.** (2011). The sequence read  
1365 archive. *Nucleic Acids Res.* **39**, D19-D21.
- 1366 **Lennon, J.J.** (2000). Red-shifts and red herrings in geographical ecology. *Ecography*  
1367 **23**, 101-113.
- 1368 **Li, P., Ponnala, L., Gandotra, N., Wang, L., Si, Y., Tausta, S.L., Kebrom, T.H.,**  
1369 **Provart, N., Patel, R., Myers, C.R., Reidel, E.J., Turgeon, R., Liu, P., Sun,**  
1370 **Q., Nelson, T., and Brutnell, T.P.** (2010). The developmental dynamics of the  
1371 maize leaf transcriptome. *Nat. Genet.* **42**, 1060-1067.
- 1372 **Li, X., Zhou, Z., Ding, J., Wu, Y., Zhou, B., Wang, R., Ma, J., Wang, S., Zhang, X.,**  
1373 **Xia, Z., Chen, J., and Wu, J.** (2016). Combined linkage and association  
1374 mapping reveals QTL and candidate genes for plant and ear height in maize.  
1375 *Front. Plant Sci.* **7**, 833.
- 1376 **Li, X., Zhu, C., Yeh, C.T., Wu, W., Takacs, E.M., Petsch, K.A., Tian, F., Bai, G.,**  
1377 **Buckler, E.S., Muehlbauer, G.J., Timmermans, M.C., Scanlon, M.J.,**  
1378 **Schnable, P.S., and Yu, J.** (2012). Genic and nongenetic contributions to  
1379 natural variation of quantitative traits in maize. *Genome Res.* **22**, 2436-2444.
- 1380 **Liu, H., Wang, X., Warburton, M.L., Wen, W., Jin, M., Deng, M., Liu, J., Tong, H.,**  
1381 **Pan, Q., Yang, X., and Yan, J.** (2015a). Genomic, transcriptomic, and  
1382 phenomic variation reveals the complex adaptation of modern maize breeding.  
1383 *Mol. Plant* **8**, 871-884.

- 1384 **Liu, Y., Zhou, M., Gao, Z., Ren, W., Yang, F., He, H., and Zhao, J.** (2015b). RNA-  
1385 Seq analysis reveals MAPKKK family members related to drought tolerance in  
1386 maize. *PLoS One* **10**, e0143128.
- 1387 **Love, M.I., Huber, W., and Anders, S.** (2014). Moderated estimation of fold change  
1388 and dispersion for RNA-Seq data with DESeq2. *Genome Biol.* **15**, 550.
- 1389 **Lu, F., Romay, M.C., Glaubitz, J.C., Bradbury, P.J., Elshire, R.J., Wang, T.Y., Li,  
1390 Y., Li, Y.X., Semagn, K., Zhang, X.C., Hernandez, A.G., Mikel, M.A., Soifer,  
1391 I., Barad, O., and Buckler, E.S.** (2015). High-resolution genetic mapping of  
1392 maize pan-genome sequence anchors. *Nat. Commun.* **6**, 6914.
- 1393 **Lunn, J.E., Delorge, I., Figueroa, C.M., Van Dijck, P., and Stitt, M.** (2014).  
1394 Trehalose metabolism in plants. *Plant J.* **79**, 544-567.
- 1395 **Maere, S., Van Dijck, P., and Kuiper, M.** (2008). Extracting expression modules  
1396 from perturbational gene expression compendia. *BMC Syst. Biol.* **2**, 33.
- 1397 **Mittler, R.** (2006). Abiotic stress, the field environment and stress combination.  
1398 *Trends Plant Sci.* **11**, 15-19.
- 1399 **Mittler, R., and Blumwald, E.** (2010). Genetic engineering for modern agriculture:  
1400 challenges and perspectives. *Annu. Rev. Plant Biol.* **61**, 443-462.
- 1401 **Murtagh, F., and Legendre, P.** (2014). Ward's hierarchical agglomerative clustering  
1402 method: which algorithms implement Ward's criterion? *J. Classif.* **31**, 274-295.
- 1403 **Nagano, Atsushi J., Sato, Y., Mihara, M., Antonio, Baltazar A., Motoyama, R.,  
1404 Itoh, H., Nagamura, Y., and Izawa, T.** (2012). Deciphering and prediction of  
1405 transcriptome dynamics under fluctuating field conditions. *Cell* **151**, 1358-  
1406 1369.
- 1407 **Nelissen, H., Moloney, M., and Inzé, D.** (2014). Translational research: from pot to  
1408 plot. *Plant Biotechnol. J.* **12**, 277-285.
- 1409 **Nelissen, H., Sprenger, H., Demuynck, K., De Block, J., Van Hautegeem, T., De  
1410 Vlieghe, A., and Inzé, D.** (2019). From laboratory to field: yield stability and  
1411 shade avoidance genes are massively differentially expressed in the field.  
1412 *Plant Biotechnol. J.*, doi:10.1111/pbi.13269.
- 1413 **Nuccio, M.L., Wu, J., Mowers, R., Zhou, H.-P., Meghji, M., Primavesi, L.F., Paul,  
1414 M.J., Chen, X., Gao, Y., Haque, E., Basu, S.S., and Lagrimini, L.M.** (2015).  
1415 Expression of trehalose-6-phosphate phosphatase in maize ears improves  
1416 yield in well-watered and drought conditions. *Nat. Biotechnol.* **33**, 862-869.
- 1417 **Oh, S.J., Kim, Y.S., Kwon, C.W., Park, H.K., Jeong, J.S., and Kim, J.K.** (2009).  
1418 Overexpression of the transcription factor AP37 in rice improves grain yield  
1419 under drought conditions. *Plant Physiol.* **150**, 1368-1379.
- 1420 **Ojala, M., and Garriga, G.C.** (2010). Permutation tests for studying classifier  
1421 performance. *J. Mach. Learn. Res.* **11**, 1833-1863.
- 1422 **Paradis, E., and Schliep, K.** (2018). ape 5.0: an environment for modern  
1423 phylogenetics and evolutionary analyses in R. *Bioinformatics* **35**, 526-528.
- 1424 **Pasaniuc, B., and Price, A.L.** (2017). Dissecting the genetics of complex traits using  
1425 summary association statistics. *Nat. Rev. Genet.* **18**, 117-127.
- 1426 **Pedregosa, F., Varoquaux, G., Gramfort, A., Michel, V., Thirion, B., Grisel, O.,  
1427 Blondel, M., Prettenhofer, P., Weiss, R., Dubourg, V., Vanderplas, J.,  
1428 Passos, A., Cournapeau, D., Brucher, M., Perrot, M., and Duchesnay, E.**  
1429 (2011). Scikit-learn: Machine learning in Python. *J. Mach. Learn. Res.* **12**,  
1430 2825-2830.
- 1431 **Phelps-Durr, T.L., Thomas, J., Vahab, P., and Timmermans, M.C.P.** (2005). Maize  
1432 rough sheath2 and its *Arabidopsis* orthologue ASYMMETRIC LEAVES1  
1433 interact with HIRA, a predicted histone chaperone, to maintain *knox* gene  
1434 silencing and determinacy during organogenesis. *Plant Cell* **17**, 2886-2898.

- 1435 **Pinheiro, J., Bates, D., DebRoy, S., Sarkar, D., and R Core Team.** (2019). nlme:  
1436 linear and nonlinear mixed effects models. [https://CRAN.R-](https://CRAN.R-project.org/package=nlme)  
1437 [project.org/package=nlme](https://CRAN.R-project.org/package=nlme).  
1438 **Plessis, A., Hafemeister, C., Wilkins, O., Gonzaga, Z.J., Meyer, R.S., Pires, I.,**  
1439 **Müller, C., Septiningsih, E.M., Bonneau, R., and Purugganan, M.** (2015).  
1440 Multiple abiotic stimuli are integrated in the regulation of rice gene expression  
1441 under field conditions. *eLife* **4**, e08411.  
1442 **Ponnu, J., Wahl, V., and Schmid, M.** (2011). Trehalose-6-phosphate: connecting  
1443 plant metabolism and development. *Front. Plant Sci* **2**, 70.  
1444 **Portwood, J.L., II, Woodhouse, M.R., Cannon, E.K., Gardiner, J.M., Harper, L.C.,**  
1445 **Schaeffer, M.L., Walsh, J.R., Sen, T.Z., Cho, K.T., Schott, D.A., Braun,**  
1446 **B.L., Dietze, M., Dunfee, B., Elsik, C.G., Manchanda, N., Coe, E., Sachs,**  
1447 **M., Stinard, P., Tolbert, J., Zimmerman, S., and Andorf, C.M.** (2018).  
1448 MaizeGDB 2018: the maize multi-genome genetics and genomics database.  
1449 *Nucleic Acids Res.* **47**, D1146-D1154.  
1450 **Proost, S., Van Bel, M., Vanechoutte, D., Van de Peer, Y., Inzé, D., Mueller-**  
1451 **Roeber, B., and Vandepoele, K.** (2015). PLAZA 3.0: an access point for plant  
1452 comparative genomics. *Nucleic Acids Res.* **43**, D974-D981.  
1453 **Rasmussen, S., Barah, P., Suarez-Rodriguez, M.C., Bressendorff, S., Friis, P.,**  
1454 **Costantino, P., Bones, A.M., Nielsen, H.B., and Mundy, J.** (2013).  
1455 Transcriptome responses to combinations of stresses in Arabidopsis. *Plant*  
1456 *Physiol.* **161**, 1783-1794.  
1457 **Rhee, S.Y., and Mutwil, M.** (2014). Towards revealing the functions of all genes in  
1458 plants. *Trends Plant Sci.* **19**, 212-221.  
1459 **Richards, C.L., Rosas, U., Banta, J., Bhambhra, N., and Purugganan, M.D.**  
1460 (2012). Genome-wide patterns of *Arabidopsis* gene expression in nature.  
1461 *PLoS Genet.* **8**, e1002662.  
1462 **Riedelsheimer, C., Czedik-Eysenberg, A., Grieder, C., Lisec, J., Technow, F.,**  
1463 **Sulpice, R., Altmann, T., Stitt, M., Willmitzer, L., and Melchinger, A.E.**  
1464 (2012). Genomic and metabolic prediction of complex heterotic traits in hybrid  
1465 maize. *Nat. Genet.* **44**, 217-220.  
1466 **Schnable, P.S., Ware, D., Fulton, R.S., Stein, J.C., Wei, F., Pasternak, S., Liang,**  
1467 **C., Zhang, J., Fulton, L., Graves, T.A., Minx, P., Reily, A.D., Courtney, L.,**  
1468 **Kruchowski, S.S., Tomlinson, C., Strong, C., Delehaunty, K., Fronick, C.,**  
1469 **Courtney, B., Rock, S.M., Belter, E., Du, F., Kim, K., Abbott, R.M., Cotton,**  
1470 **M., Levy, A., Marchetto, P., Ochoa, K., Jackson, S.M., Gillam, B., Chen,**  
1471 **W., Yan, L., Higginbotham, J., Cardenas, M., Waligorski, J., Applebaum,**  
1472 **E., Phelps, L., Falcone, J., Kanchi, K., Thane, T., Scimone, A., Thane, N.,**  
1473 **Henke, J., Wang, T., Ruppert, J., Shah, N., Rotter, K., Hodges, J.,**  
1474 **Ingenthron, E., Cordes, M., Kohlberg, S., Sgro, J., Delgado, B., Mead, K.,**  
1475 **Chinwalla, A., Leonard, S., Crouse, K., Collura, K., Kudrna, D., Currie, J.,**  
1476 **He, R., Angelova, A., Rajasekar, S., Mueller, T., Lomeli, R., Scara, G., Ko,**  
1477 **A., Delaney, K., Wissotski, M., Lopez, G., Campos, D., Braidotti, M.,**  
1478 **Ashley, E., Golser, W., Kim, H., Lee, S., Lin, J., Dujmic, Z., Kim, W., Talag,**  
1479 **J., Zuccolo, A., Fan, C., Sebastian, A., Kramer, M., Spiegel, L.,**  
1480 **Nascimento, L., Zutavern, T., Miller, B., Ambroise, C., Muller, S., Spooner,**  
1481 **W., Narechania, A., Ren, L., Wei, S., Kumari, S., Faga, B., Levy, M.J.,**  
1482 **McMahan, L., Van Buren, P., Vaughn, M.W., Ying, K., Yeh, C.-T., Emrich,**  
1483 **S.J., Jia, Y., Kalyanaraman, A., Hsia, A.-P., Barbazuk, W.B., Baucom, R.S.,**  
1484 **Brutnell, T.P., Carpita, N.C., Chaparro, C., Chia, J.-M., Deragon, J.-M.,**  
1485 **Estill, J.C., Fu, Y., Jeddelloh, J.A., Han, Y., Lee, H., Li, P., Lisch, D.R., Liu,**



- 1486 S., Liu, Z., Nagel, D.H., McCann, M.C., SanMiguel, P., Myers, A.M.,  
1487 Nettleton, D., Nguyen, J., Penning, B.W., Ponnala, L., Schneider, K.L.,  
1488 Schwartz, D.C., Sharma, A., Soderlund, C., Springer, N.M., Sun, Q., Wang,  
1489 H., Waterman, M., Westerman, R., Wolfgruber, T.K., Yang, L., Yu, Y.,  
1490 Zhang, L., Zhou, S., Zhu, Q., Bennetzen, J.L., Dawe, R.K., Jiang, J., Jiang,  
1491 N., Presting, G.G., Wessler, S.R., Aluru, S., Martienssen, R.A., Clifton,  
1492 S.W., McCombie, W.R., Wing, R.A., and Wilson, R.K. (2009). The B73  
1493 maize genome: complexity, diversity, and dynamics. *Science* **326**, 1112-1115.
- 1494 **Schrag, T.A., Westhues, M., Schipprack, W., Seifert, F., Thiemann, A., Scholten,**  
1495 **S., and Melchinger, A.E.** (2018). Beyond genomic prediction: combining  
1496 different types of omics data can improve prediction of hybrid performance in  
1497 maize. *Genetics* **208**, 1373-1385.
- 1498 **Smoot, M., Ono, K., Ideker, T., and Maere, S.** (2011). PiNGO: a Cytoscape plugin  
1499 to find candidate genes in biological networks. *Bioinformatics* **27**, 1030-1031.
- 1500 **Steinfath, M., Gärtner, T., Lisec, J., Meyer, R.C., Altmann, T., Willmitzer, L., and**  
1501 **Selbig, J.** (2010). Prediction of hybrid biomass in *Arabidopsis thaliana* by  
1502 selected parental SNP and metabolic markers. *Theor. Appl. Genet.* **120**, 239-  
1503 247.
- 1504 **Suzuki, N., Rivero, R.M., Shulaev, V., Blumwald, E., and Mittler, R.** (2014). Abiotic  
1505 and biotic stress combinations. *New Phytol.* **203**, 32-43.
- 1506 **Tanay, A., Sharan, R., and Shamir, R.** (2002). Discovering statistically significant  
1507 biclusters in gene expression data. *Bioinformatics* **18**, S136-S144.
- 1508 **Taniguchi, M., Furutani, M., Nishimura, T., Nakamura, M., Fushita, T., Iijima, K.,**  
1509 **Baba, K., Tanaka, H., Toyota, M., Tasaka, M., and Morita, M.T.** (2017). The  
1510 *Arabidopsis* LAZY1 family plays a key role in gravity signaling within  
1511 statocytes and in branch angle control of roots and shoots. *Plant Cell* **29**,  
1512 1984-1999.
- 1513 **The Gene Ontology Consortium.** (2017). Expansion of the gene ontology  
1514 knowledgebase and resources. *Nucleic Acids Res.* **45**, D331-D338.
- 1515 **Thoen, M.P., Davila Olivas, N.H., Kloth, K.J., Coolen, S., Huang, P.P., Aarts,**  
1516 **M.G., Bac-Molenaar, J.A., Bakker, J., Bouwmeester, H.J., Broekgaarden,**  
1517 **C., Bucher, J., Busscher-Lange, J., Cheng, X., Fradin, E.F., Jongsma,**  
1518 **M.A., Julkowska, M.M., Keurentjes, J.J., Ligterink, W., Pieterse, C.M.,**  
1519 **Ruyter-Spira, C., Smant, G., Testerink, C., Usadel, B., van Loon, J.J., van**  
1520 **Pelt, J.A., van Schaik, C.C., van Wees, S.C., Visser, R.G., Voorrips, R.,**  
1521 **Vosman, B., Vreugdenhil, D., Warmerdam, S., Wiegiers, G.L., van**  
1522 **Heerwaarden, J., Kruijer, W., van Eeuwijk, F.A., and Dicke, M.** (2017).  
1523 Genetic architecture of plant stress resistance: multi-trait genome-wide  
1524 association mapping. *New Phytol.* **213**, 1346-1362.
- 1525 **Tseng, G.C., and Wong, W.H.** (2005). Tight clustering: a resampling-based  
1526 approach for identifying stable and tight patterns in data. *Biometrics* **61**, 10-16.
- 1527 **Van Eck, L., Davidson, R.M., Wu, S., Zhao, B.Y., Botha, A.-M., Leach, J.E., and**  
1528 **Lapitan, N.L.V.** (2014). The transcriptional network of *WRKY53* in cereals  
1529 links oxidative responses to biotic and abiotic stress inputs. *Funct. Integr.*  
1530 *Genomics* **14**, 351-362.
- 1531 **Vanous, A., Gardner, C., Blanco, M., Martin-Schwarze, A., Lipka, A.E., Flint-**  
1532 **Garcia, S., Bohn, M., Edwards, J., and Lübberstedt, T.** (2018). Association  
1533 mapping of flowering and height traits in germplasm enhancement of maize  
1534 doubled haploid (GEM-DH) lines. *Plant Genome-Ur* **11**, 170083.
- 1535 **Wallace, J.G., Zhang, X.C., Beyene, Y., Semagn, K., Olsen, M., Prasanna, B.M.,**  
1536 **and Buckler, E.S.** (2016). Genome-wide association for plant height and

- 1537 flowering time across 15 tropical maize populations under managed drought  
1538 stress and well-watered conditions in Sub-Saharan Africa. *Crop Sci.* **56**, 2365-  
1539 2378.
- 1540 **Wang, B.B., Liu, H., Liu, Z.P., Dong, X.M., Guo, J.J., Li, W., Chen, J., Gao, C.,**  
1541 **Zhu, Y.B., Zheng, X.M., Chen, Z.L., Chen, J., Song, W.B., Hauck, A., and**  
1542 **Lai, J.S.** (2018a). Identification of minor effect QTLs for plant architecture  
1543 related traits using super high density genotyping and large recombinant  
1544 inbred population in maize (*Zea mays*). *BMC Plant Biol.* **18**, 17.
- 1545 **Wang, C.-T., Ru, J.-N., Liu, Y.-W., Yang, J.-F., Li, M., Xu, Z.-S., and Fu, J.-D.**  
1546 (2018b). The maize WRKY transcription factor ZmWRKY40 confers drought  
1547 resistance in transgenic *Arabidopsis*. *Int. J. Mol. Sci.* **19**, 2580.
- 1548 **Wang, Y., Zhou, Z., Gao, J., Wu, Y., Xia, Z., Zhang, H., and Wu, J.** (2016). The  
1549 mechanisms of maize resistance to *Fusarium verticillioides* by comprehensive  
1550 analysis of RNA-Seq data. *Front. Plant Sci.* **7**, 1654.
- 1551 **Wimalanathan, K., Friedberg, I., Andorf, C.M., and Lawrence-Dill, C.J.** (2018).  
1552 Maize GO annotation—methods, evaluation, and review (maize-GAMER).  
1553 *Plant Direct* **2**, e00052.
- 1554 **Wu, T.D., and Nacu, S.** (2010). Fast and SNP-tolerant detection of complex variants  
1555 and splicing in short reads. *Bioinformatics* **26**, 873-881.
- 1556 **Xiao, Y., Liu, H., Wu, L., Warburton, M., and Yan, J.** (2017). Genome-wide  
1557 association studies in maize: praise and stargaze. *Mol. Plant* **10**, 359-374.
- 1558 **Xue, S., Bradbury, P.J., Casstevens, T., and Holland, J.B.** (2016). Genetic  
1559 architecture of domestication-related traits in maize. *Genetics* **204**, 99-113.
- 1560 **Yang, L., Perrera, V., Saploura, E., Apelt, F., Bahin, M., Kramdi, A., Olas, J.,**  
1561 **Mueller-Roeber, B., Sokolowska, E., Zhang, W., Li, R., Pitzalis, N.,**  
1562 **Heinlein, M., Zhang, S., Genovesio, A., Colot, V., and Kragler, F.** (2019).  
1563 m<sup>5</sup>C methylation guides systemic transport of messenger RNA over graft  
1564 junctions in plants. *Curr. Biol.* **29**, 2465-2476.
- 1565 **Yuan, Y., Cairns, J.E., Babu, R., Gowda, M., Makumbi, D., Magorokosho, C.,**  
1566 **Zhang, A., Liu, Y., Wang, N., Hao, Z., San Vicente, F., Olsen, M.S.,**  
1567 **Prasanna, B.M., Lu, Y., and Zhang, X.** (2019). Genome-wide association  
1568 mapping and genomic prediction analyses reveal the genetic architecture of  
1569 grain yield and flowering time under drought and heat stress conditions in  
1570 maize. *Front. Plant Sci.* **9**, 1919.
- 1571 **Zaidem, M.L., Groen, S.C., and Purugganan, M.D.** (2019). Evolutionary and  
1572 ecological functional genomics, from lab to the wild. *Plant J.* **97**, 40-55.
- 1573 **Zhang, X., Liu, X., Zhang, D., Tang, H., Sun, B., Li, C., Hao, L., Liu, C., Li, Y., Shi,**  
1574 **Y., Xie, X., Song, Y., Wang, T., and Li, Y.** (2017). Genome-wide identification  
1575 of gene expression in contrasting maize inbred lines under field drought  
1576 conditions reveals the significance of transcription factors in drought tolerance.  
1577 *PLoS One* **12**, e0179477.
- 1578 **Zhao, S., Luo, Y., Zhang, Z., Xu, M., Wang, W., Zhao, Y., Zhang, L., Fan, Y., and**  
1579 **Wang, L.** (2014). *ZmSOC1*, a MADS-box transcription factor from *Zea mays*,  
1580 promotes flowering in *Arabidopsis*. *Int. J. Mol. Sci.* **15**, 19987-20003.
- 1581 **Zheng, Z., Qamar, S.A., Chen, Z., and Mengiste, T.** (2006). *Arabidopsis* WRKY33  
1582 transcription factor is required for resistance to necrotrophic fungal pathogens.  
1583 *Plant J.* **48**, 592-605.
- 1584 **Zou, H., and Hastie, T.** (2005). Regularization and variable selection via the elastic  
1585 net. *J. Roy. Stat. Soc. B Met.* **67**, 301-320.

1586

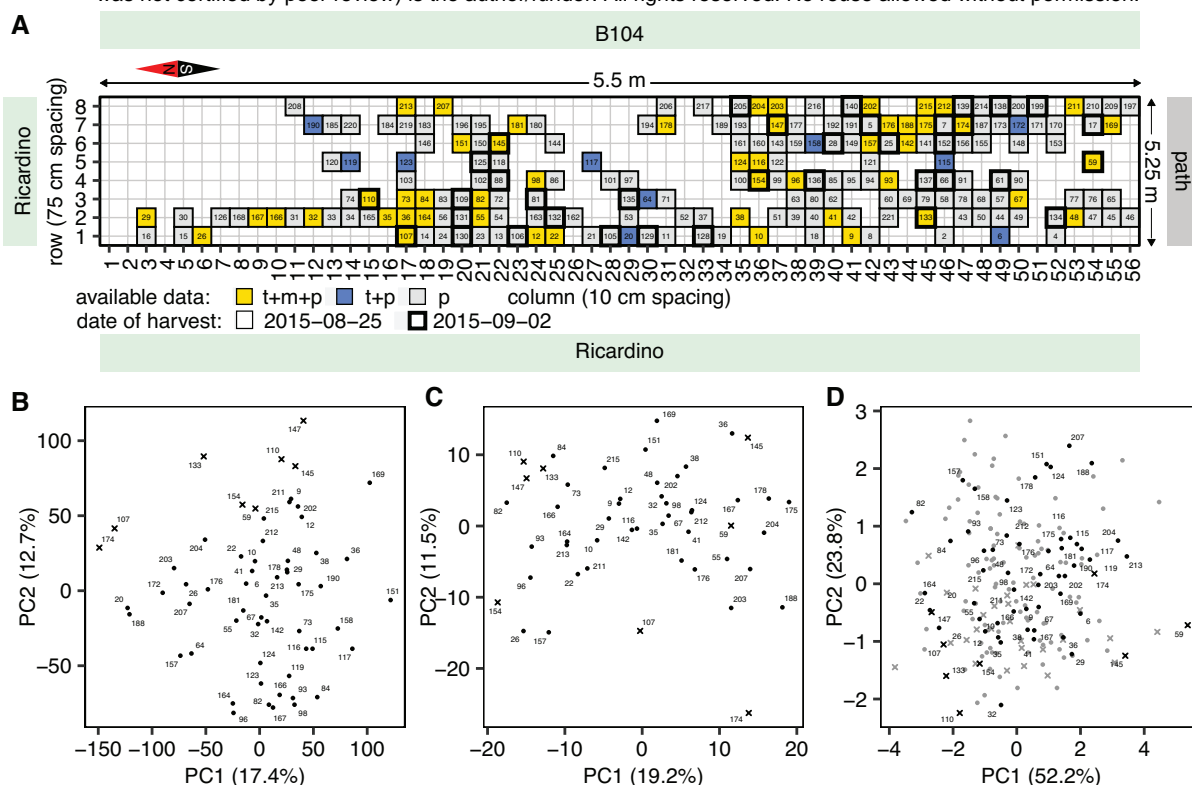

**Figure 1. Field trial design and exploratory data analysis. (A)** Layout of the field trial. A total of 560 *Zea mays* B104 plants were grown in a grid of 10 rows by 56 columns. Border rows 0 and 9 are not shown on the plot, and the dimensions on the figure are not to scale. Phenotypic data was measured for 200 plants (p). Transcriptome (RNA-seq) data was profiled for 60 out of those 200 plants (t+p). Metabolome data is available for 50 out of those 60 plants (t+m+p). Some plants were harvested later (see Methods), as indicated by a thicker cell border. **(B)** Plot showing the first two principal components (PCs) in a PCA of the 60 single-plant transcriptomes. **(C)** Plot showing the first two principal components (PCs) in a PCA of the 50 single-plant metabolomes. **(D)** Plot showing the first two principal components (PCs) in a PCA of the 200 plant phenomes. Light grey markers in panel **(D)** indicate plants for which only phenotype information is available. Only plants for which transcriptome data is available are numbered in plots **(B)-(D)**, according to the numbering in panel **(A)**. Crosses in panels **(B)-(D)** indicate plants harvested on the second harvest day.



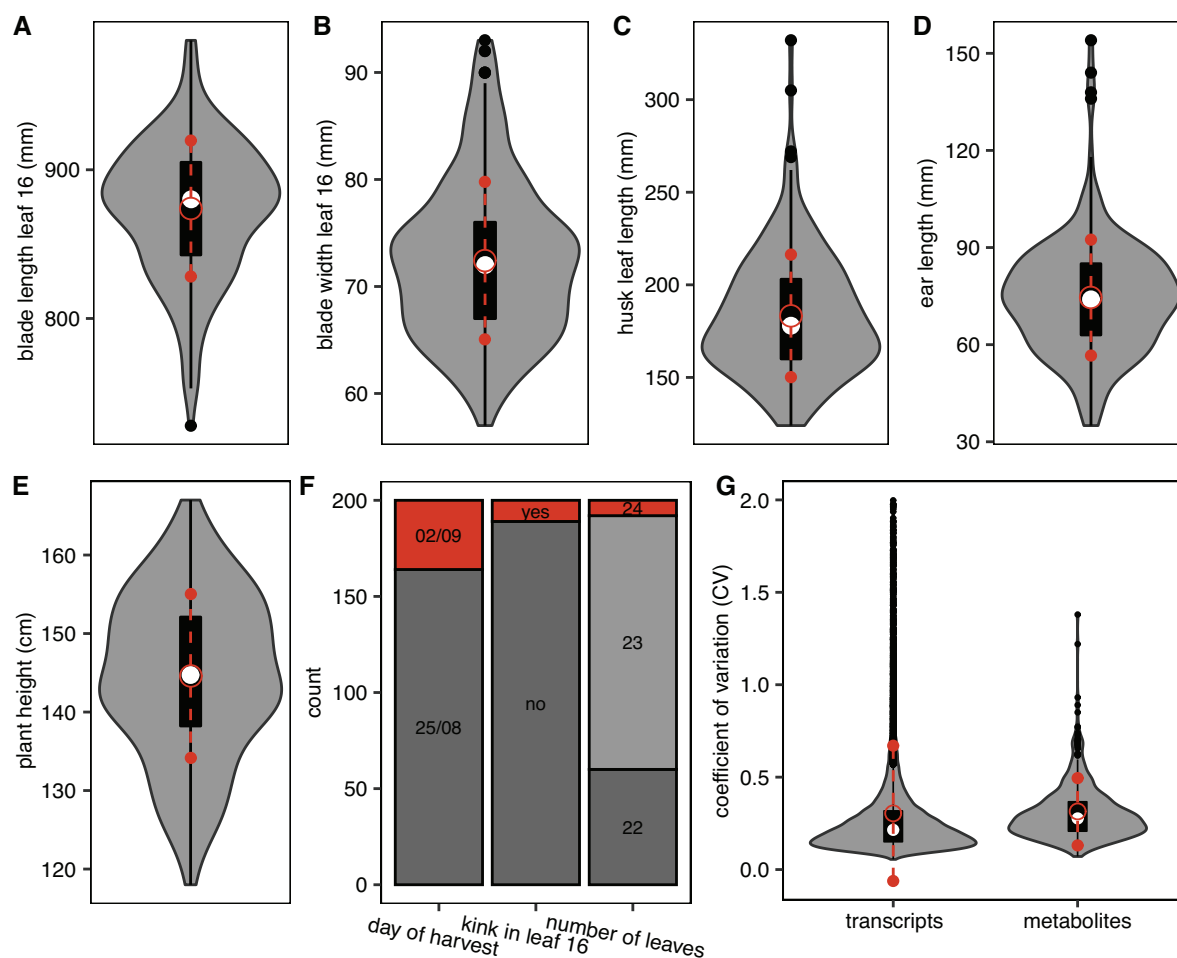

**Figure 2. Transcriptomic, metabolic and phenotypic variability among individual field-grown maize plants.** In panels (A) to (E), violin plots show the variability in continuous leaf 16, ear and plant height phenotypes among individual plants. Panel (F) depicts the variability in harvesting date among plants, as well as the variability in two discrete phenotypes, namely the number of leaves at harvest and whether or not leaf 16 was kinked. Panel (G) shows violin plots for the distribution of the coefficient of variance (CV) across the sampled plants for the levels of individual transcripts and metabolites. For visualization purposes, the transcript CV was capped at 2.0. In all violin plots, the median is indicated by the white circle. The black box extends from the 25th to the 75th percentile, and black whiskers extend from each end of the box to the most extreme values within 1.5 times the interquartile range from the respective end. Data points beyond this range are shown as black dots. The red open circle indicates the mean of the distribution, with red whiskers extending to 1 standard deviation above and below the mean.

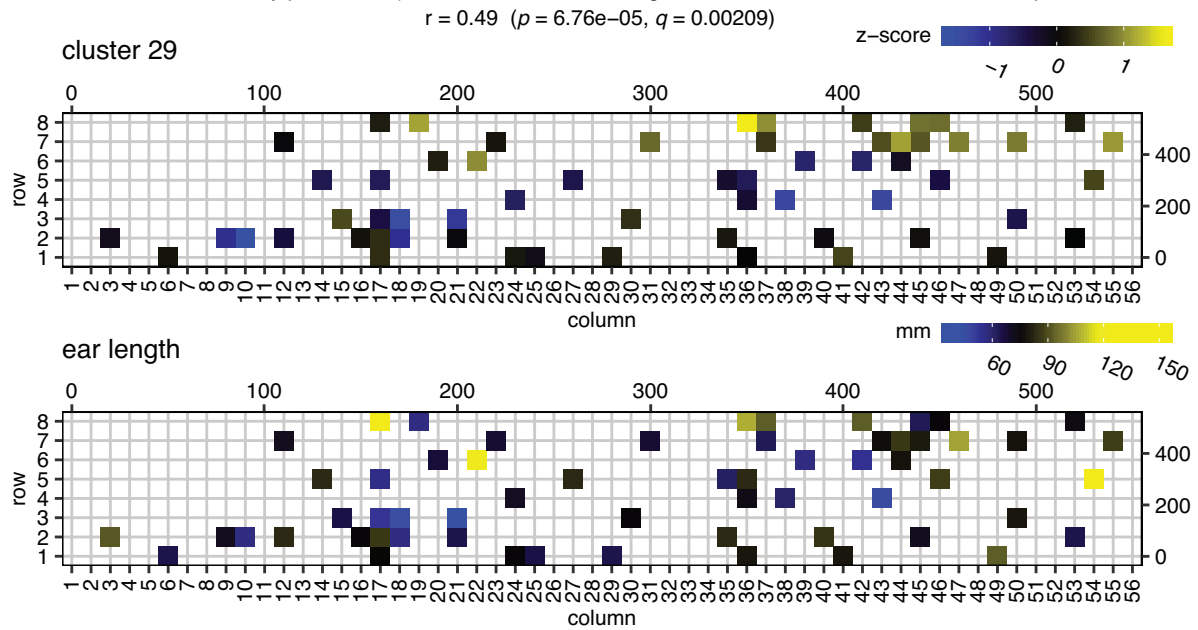

**Figure 3. Gene expression patterns in spatially autocorrelated gene cluster 29 correlate with ear length.** The top panel displays the average z-scored gene expression profile of spatially autocorrelated gene cluster 29 (35 genes), mapped to the field. The bottom panel displays the ear length phenotype on the field (only for plants that were transcriptome profiled). Shown on top are the Pearson's correlation ( $r$ ) between the cluster 29 expression profile and ear length, the corresponding  $p$ -value (computed using `cor.test` in R) and the corresponding  $q$ -value (computed using the Benjamini-Hochberg method on all comparisons of cluster gene expression profiles with the ear length profile). The scales on the top and to the right of the field maps give field plot dimensions in cm.

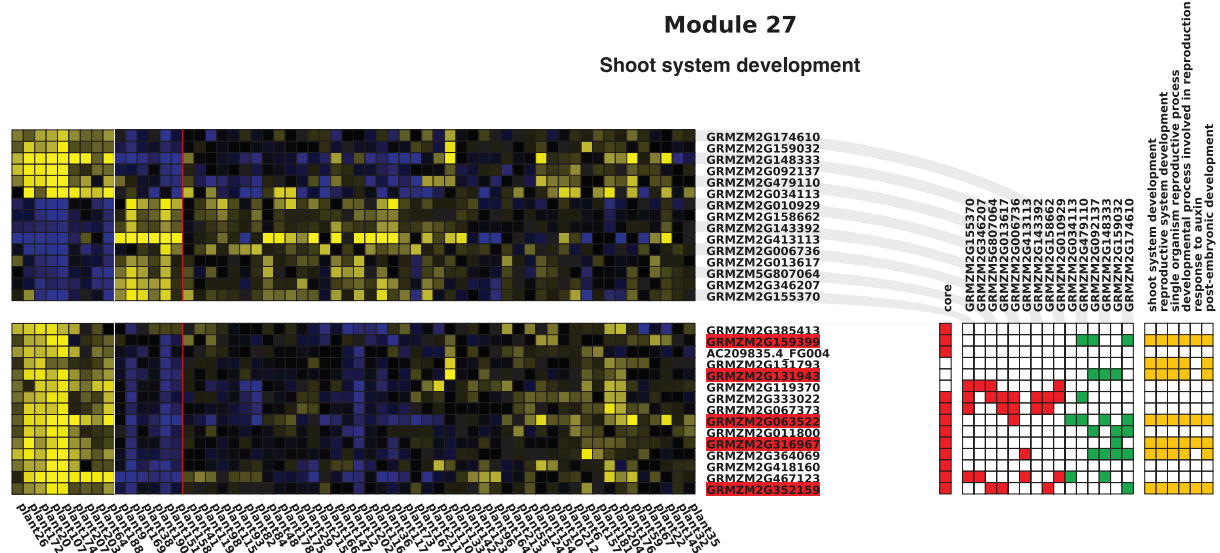

**Figure 4. Example ENIGMA module learned from the single-plant transcriptome dataset.** Yellow/blue squares indicate higher/lower gene expression with respect to the average expression of a gene across plants. The bottom grid shows the expression profiles of the module genes, while the top grid contains the expression profiles of predicted regulators of the module. Significant co-differential expression links between the regulators and the module genes are indicated in the red/green matrix to the right (green = positively correlated, red = negatively correlated). Gene names highlighted in red indicate regulators that are part of the module. Genes indicated as core genes belong to the original module seed, other genes were accreted by the seed in the course of module formation (Maere et al., 2008). Enriched GO categories in the module gene set are displayed on the right, with orange squares depicting which module genes are annotated to these GO categories. This particular module is significantly enriched ( $q \leq 0.01$ ) in known reproductive system development genes, mostly regulators.

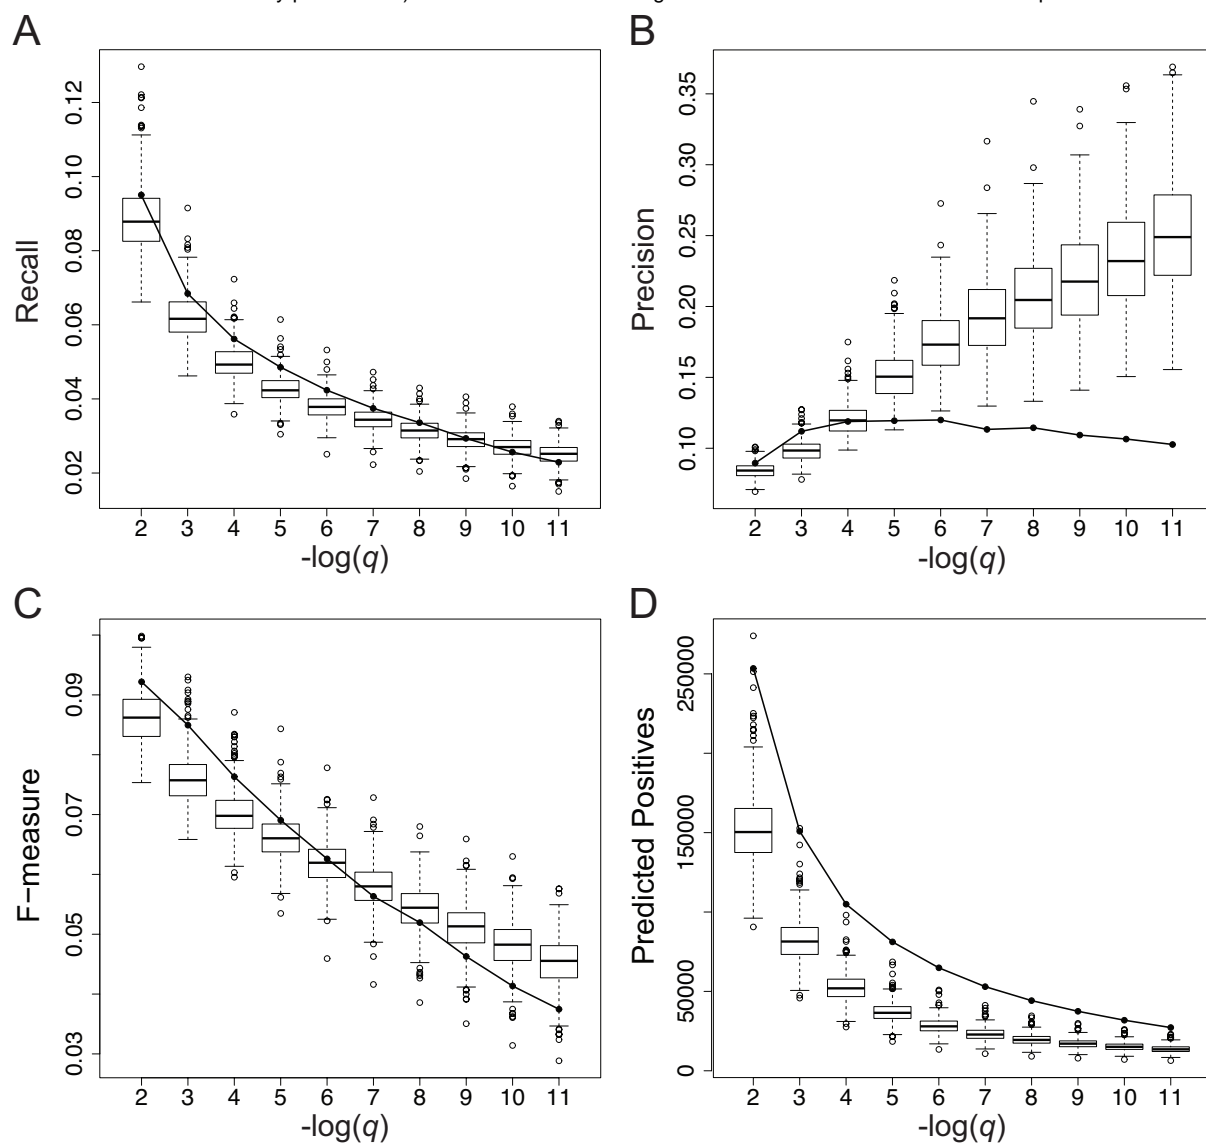

**Figure 5. Global gene function prediction performance.** Panels (A) to (D) depict the gene function prediction performance of the single-plant network (solid line) and 500 sampled networks (box-and-whisker plots) averaged across all genes in a given network. Boxes extend from the 25th to the 75th percentile of the sampled networks, with the median indicated by the central black line. Whiskers extend from each end of the box to the most extreme values within 1.5 times the interquartile range from the respective end. Data points beyond this range are displayed as open black circles. Panels (A), (B) and (C) respectively represent the recall, precision and F-measure of the network-based gene function predictions as a function of the prediction FDR threshold ( $q$ ). Panel (D) depicts the number of gene functions predicted from each network (predicted positives = true positives + false positives) as a function of the prediction FDR threshold. As multiple gene functions can be predicted per gene, the number of predicted positives is generally higher than the number of genes.

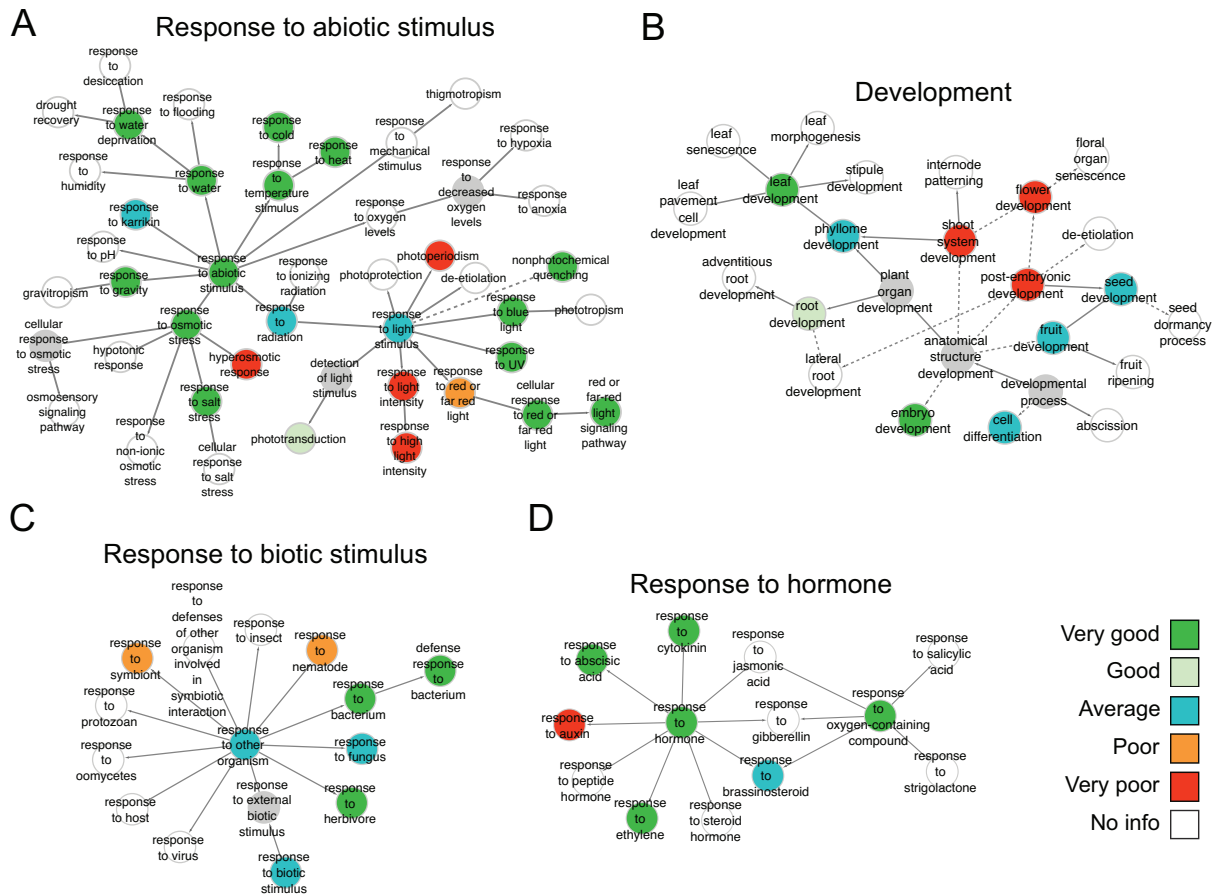

**Figure 6. Gene function prediction performance for specific GO categories.** Panels (A) to (D) show the gene function prediction performance of the single-plant network versus sampled networks for GO categories related to abiotic stimulus responses, development, biotic stimulus responses and hormone responses, respectively. Categories are shown in the context of the GO hierarchy and colored according to how well the single-plant network performs in comparison with 500 sampled networks (see Methods). Solid arrows represent direct parent-child relationships in GO, dashed arrows represent indirect relationships. Grey nodes depict untested GO categories. White nodes depict GO categories for which there was insufficient information to score the performance of the single-plant network versus the sampled networks, i.e. categories for which the single-plant network and more than half of the sampled networks did not give rise to any predictions at  $q \leq 10e-2$ .

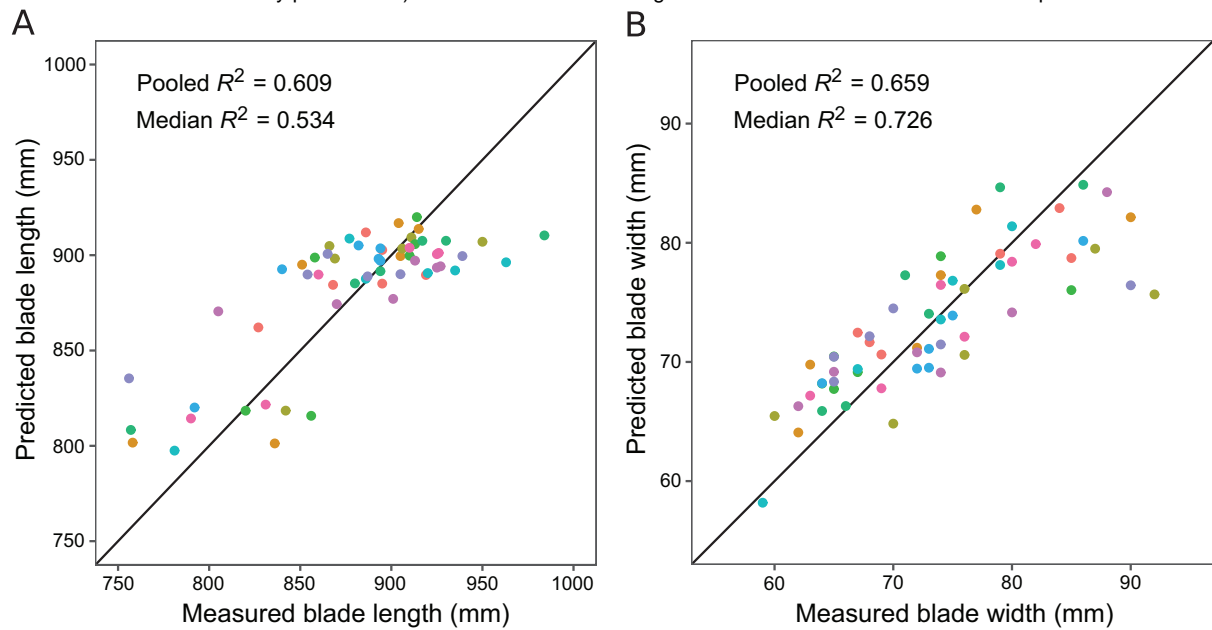

**Figure 7. Predictive models for leaf 16 blade length and width.** Graphs plotting predicted versus measured phenotypes are shown for **(A)** the random forest model for leaf 16 blade length using only transcript levels of regulators as predictors, and **(B)** the e-net model for leaf 16 blade width using only transcript levels of regulators as predictors. The dot colors represent different outer cross-validation folds. Perfect predictions are located on the diagonal line in each panel.
